# Supplementary material for: Mechanism-free repurposing of drugs for C9orf72-related ALS/FTD using large-scale genomic data
Source: PubMed Central journal article supplement — Cell Genom. 2024 Oct 21;4(11):100679. doi: 10.1016/j.xgen.2024.100679 (PMC11605688; doi:10.1016/j.xgen.2024.100679), 2024-10-21
Supplement: mmc1.pdf [file mmc1.pdf]

## Supplemental information

### Mechanism-free repurposing of drugs

#### for *C9orf72*-related ALS/FTD

#### using large-scale genomic data

Sara Saez-Atienzar, Cleide dos Santos Souza, Ruth Chia, Selina N. Beal, Ileana Lorenzini, Ruili Huang, Jennifer Levy, Camelia Burciu, Jinhui Ding, J. Raphael Gibbs, Ashley Jones, Ramita Dewan, Viviana Pensato, Silvia Peverelli, Lucia Corrado, Joke J.F.A. van Vugt, Wouter van Rheenen, Ceren Tunca, Elif Bayraktar, Menghang Xia, The International ALS Genomics Consortium, ITALSGEN Consortium, SLAGEN Consortium, Project MinE ALS Sequencing Consortium, Alfredo Iacoangeli, Aleksey Shatunov, Cinzia Tiloca, Nicola Ticozzi, Federico Verde, Letizia Mazzini, Kevin Kenna, Ahmad Al Khleifat, Sarah Opie-Martin, Flavia Raggi, Massimiliano Filosto, Stefano Cotti Piccinelli, Alessandro Padovani, Stella Gagliardi, Maurizio Inghilleri, Alessandra Ferlini, Rosario Vasta, Andrea Calvo, Cristina Moglia, Antonio Canosa, Umberto Manera, Maurizio Grassano, Jessica Mandrioli, Gabriele Mora, Christian Lunetta, Raffaella Tanel, Francesca Trojsi, Patrizio Cardinali, Salvatore Gallone, Maura Brunetti, Daniela Galimberti, Maria Serpente, Chiara Fenoglio, Elio Scarpini, Giacomo P. Comi, Stefania Corti, Roberto Del Bo, Mauro Ceroni, Giuseppe Lauria Pinter, Franco Taroni, Eleonora Dalla Bella, Enrica Bersano, Charles J. Curtis, Sang Hyuck Lee, Raymond Chung, Hamel Patel, Karen E. Morrison, Johnathan Cooper-Knock, Pamela J. Shaw, Gerome Breen, Richard J.B. Dobson, Clifton L. Dalgard, The American Genome Center, Sonja W. Scholz, Ammar Al-Chalabi, Leonard H. van den Berg, Russell McLaughlin, Orla Hardiman, Cristina Cereda, Gianni Sorarù, Sandra D'Alfonso, Siddharthan Chandran, Suvankar Pal, Antonia Ratti, Cinzia Gellera, Kory Johnson, Tara Doucet-O'Hare, Nicholas Pasternack, Tongguang Wang, Avindra Nath, Gabriele Siciliano, Vincenzo Silani, Ayşe Nazlı Başak, Jan H. Veldink, William Camu, Jonathan D. Glass, John E. Landers, Adriano Chiò, Rita Sattler, Christopher E. Shaw, Laura Ferraiuolo, Isabella Fogh, and Bryan J. Traynor

## SUPPLEMENTARY METHODS

### Replication cohort

The DNA samples for the replication cohort were obtained from a different study (principal investigator: Christopher Shaw, King's College London). These samples were collected at (A) King's College London and (B) Project MinE Sequencing Consortium (Utrecht University) as described below:

#### (A) The King's College London

The DNA samples of 464 novel *C9orf72* repeat expansion carriers were collected at King's College London. The participants were recruited through the SLAGEN Consortium, Boğaziçi University, and Scotland University. Details of the cohorts are as follows:

(1) **Italy (SLAGEN Consortium).** DNA samples of the novel Italian carriers were collected by the SLAGEN Consortium through the contribution of several Tertiary Centers and Clinical Laboratories across Italy. Patients were diagnosed with ALS according to the El Escorial revised criteria at the ALS tertiary referral center of Istituto Auxologico Italiano IRCCS [S1]. All patients had probable or definite familial ALS according to the Byrne criteria for FALS. Cognitive assessment in the care of ALS patients adopted standard neuropsychological assessment suitable for patients with verbal and motor impairment, such as the Edinburgh Cognitive and Behavioural ALS Screen (ECAS) [S2]. All individuals gave written informed consent, and the Ethics Committee of the Istituto Auxologico Italiano IRCCS, Milan, approved this protocol. Screening for the expanded repeats in the *C9orf72* gene was performed by a two-step protocol, including genotyping PCR followed by a repeat-primed PCR, as previously described [S3, S4].

(2) **Turkey (Boğaziçi University).** DNA samples of the Turkish carriers were collected at the Boğaziçi University and recruited across Turkey between 2002 and 2019. All individuals gave written informed consent, and the Ethics Committee on Research with Human Participants (INAREK) and Boğaziçi University, Istanbul, approved this protocol. Genomic DNA was isolated from whole blood using the MagNa Pure Compact System (Roche, Switzerland). The *C9orf72* GGGGCC repeat expansion was screened by Repeat-primed touchdown PCR using FastStart Universal Master Mix (Roche, Switzerland). FAM-labeled PCR products were subjected to fragment length analysis (Macrogen, Korea), and a saw-tooth pattern in expansion-positive cases was visualized in PeakScanner Software (ThermoFisher Scientific, USA) [S5, S6].

(3) **Scotland (Edinburgh University).** DNA samples were obtained from patients with ALS who donated blood for research to the Scottish Regenerative Neurology Tissue Bank as part of the Scottish Motor Neurone Disease (MND) Register. ALS patients were diagnosed following the 'El Escorial' criteria [S7]. Ethical approval for research analysis of the Scottish Regenerative Neurology Tissue Bank samples affiliated with the Scottish MND register was obtained from the East of Scotland Research Ethics Service.

#### (B) Project MinE Sequencing Consortium cohort (Utrecht University)

A total of 456 *C9orf72* carriers were obtained from the Project MinE data, which consisted of a collection of ALS patients recruited worldwide through the collaboration of tertiary referral clinics for motor neuron disease. Neurologists from the European participating Tertiary Centers who are members of the EU Joint Program – Neurodegenerative Diseases Research (JPND) project STRENGTH and the Project MinE Sequencing Consortium have agreed to follow shared standard parameters in the collection of clinical information of ALS patients. Neurologic examination and diagnostic tests were used to determine whether participants met the revised El Escorial criteria for possible, probable, laboratory-supported, or definite ALS as fully described elsewhere [S1, S8]. Details of the cohorts are as follows:

- (1) **The Netherlands.** ALS patients were diagnosed with ALS at the tertiary referral clinic for motor neuron disease at the University Medical Center Utrecht (Dutch ALS Center) or were included in the Prospective ALS Study in The Netherlands. Patients were not pre-screened for any mutations related to ALS. All individuals gave written informed consent, and the University Medical Center Utrecht Medical Ethics Committee, Utrecht, approved this protocol.
- (2) **UK MND Biobank.** Neurologists diagnosed cases with ALS in one of twenty UK hospitals specialized in motor neuron diseases, and patients had no family history of ALS. All participated in the UK National Biobank for Motor Neuron Disease Research. All individuals gave written informed consent, and the Trent University Medical Ethics Committee approved this protocol.
- (3) **Turkey.** ALS patients were recruited from hospitals across Turkey between 2002 and 2019. DNA samples were collected at Boğaziçi University. A full description of individuals gave written informed consent, and the Ethics Committee on Research with Human Participants (INAREK) at Boğaziçi University, Istanbul, approved this protocol.
- (4) **Belgium.** Patients were diagnosed with ALS at the tertiary referral clinic for motor neuron diseases at the University Hospitals in Leuven. All individuals gave written informed consent, and the Ethical Committee of the University Hospitals in Leuven approved this protocol.
- (5) **Ireland.** Cases were diagnosed with probable or definite ALS according to the El Escorial Criteria by neurologists specialized in motor neuron diseases at Beaumont Hospital in Dublin [S7]. Patients were part of an ongoing population-based prospective ALS registry. Patients were selected for sequencing so that all areas of Ireland were adequately represented. All individuals reported Irish ancestry for at least three generations. All individuals gave written informed consent, and the Beaumont Hospital Research & Ethics Committee, Dublin, approved this protocol.
- (6) **Spain.** According to the El Escorial criteria, ALS patients were diagnosed with definite or probable ALS [S7]. Neurologists and neurophysiologists saw patients at the tertiary referral centers: the Bellvitge Hospital and Carlos III Hospital for Catalonia and Madrid, respectively. All individuals gave written informed consent, and the Bellvitge University Hospital Ethics Committee, Barcelona, and “Comité de Ética de la Investigación del Hospital Carlos III,” Madrid, approved this protocol.
- (7) **The United States.** All samples were taken from patients seen at the Emory ALS Center in Atlanta, Georgia, USA. The Emory Center is a tertiary care ALS clinic that cares for many patients in Georgia and the surrounding states. Diagnoses were made by neurologists specializing in neuromuscular diseases and motor neuron diseases. After informed consent, complete demographic and clinical information was stored in the clinic database. DNA was collected and stored. All individuals gave written informed consent, and the Committee for the Protection of Human Subjects in Research of the University of Massachusetts Medical School, Worcester, approved this protocol.
- (8) **France.** ALS patients were diagnosed with probable or definite ALS according to the El Escorial criteria by neurologists specialized in motor neuron diseases at the Reference centers for ALS of the University Hospitals of Limoges and Tours (LITORALS federation), members of the French FILSLAN networks [S7]. All individuals gave written informed consent, and the ethics committee of Tours Hospital and Limoges University Hospital approved this protocol.
- (9) **Sweden.** Cases were diagnosed with probable or definite ALS according to the revised El Escorial Criteria by neurologists specialized in motor neuron diseases [S1]. All participants were of Swedish descent and had reported Northern Swedish citizenship for at least three generations. All individuals gave written informed consent, and the Regional Ethical Review Board in Umeå approved this protocol.
- (10) **Israel.** ALS patients were diagnosed with probable or definite ALS according to the El Escorial criteria [S7] and in follow-up at the tertiary referral ALS clinic at the Hadassah University Hospital, Jerusalem, or Tel-Aviv Sourasky Medical Center in Tel-Aviv. Patients were not pre-screened for any

mutations related to ALS. Patients were referred from all regions in Israel and participated in a prospective ALS database and sample repository. All individuals gave written informed consent, and the Hadassah University Hospital Institutional Review Board, Hadassah, and The Institutional Review Board of Tel Aviv Sourasky Medical Center, Tel Aviv, approved this protocol.

(11) **Portugal.** According to the revised El-Escorial criteria [S1], neurologists specialized in motor neuron diseases diagnosed patients with possible, probable, or definite ALS. All individuals gave written informed consent, and the Local Research Ethics Committee at the Faculty of Medicine, University of Lisbon, approved this protocol.

(12) **Italy.** Patients were diagnosed with ALS according to the El Escorial revised criteria at the ALS tertiary referral center of Istituto Auxologico Italiano IRCCS [S1]. All patients had probable or definite familial ALS according to the Byrne criteria for FALS in the *SOD1*, *TARDBP*, *FUS*, and *C9orf72* genes. All individuals gave written informed consent, and the Ethics Committee of the IRCCS Istituto Auxologico Italiano, Milan, approved this protocol.

(13) **Switzerland.** ALS patients were diagnosed at the Muskelzentrum/ALS clinic at the Kantonsspital St. Gallen, a tertiary referral center in Northern Switzerland. Patients fulfilled the El-Escorial Criteria for probable lab supported, probable or definite, or ALS [S7]. All individuals gave written informed consent, and the Kantonale Ethikkommission des Kantons St. Gallen approved this protocol.

Overall, of the 836 ALS/FTD *C9orf72* repeat expansion carriers who passed the quality control (QC) thresholds, complete clinical information was available for 713 (n = 385 males and n = 328 females) individuals. Of those, only 699 did not overlap with the training dataset.

### SNP array-based genotyping in the replication dataset

*C9orf72* carriers (n=464) from the King's College London cohort were genotyped on the Illumina InfiniumOmni2-5-8v1-4\_A1 platform in the Illumina certified laboratory of the Department of Social Genetic & Developmental Psychiatry, King's College London. Genotype raw data were first annotated to the dbSNP150 and merged after alignment to the same genomic coordinate (coordinates GRCh37). All multi-allelic and A/T or C/G SNPs were excluded. Pre-phasing quality control steps were performed according to PLINK's standard protocols (version 1.9) [S9]. SNPs were excluded by low call rate < 99% (--geno 0.01), minor allele frequency (MAF) > 0.01, and Hardy-Weinberg disequilibrium (HWE) <  $1 \times 10^{-6}$ . Individuals were removed by missingness genotype value of 3%, (--mind 0.03), by the +/-3SD to the mean of the inbreeding distribution F (+/- 0.25), if with mismatches between genetic and reported gender. Related and duplicated individuals were identified by calculating each pair of individuals' identity by state (IBS) status. Those who passed the threshold of PI\_HAT > 0.175 were excluded from further analyses. Ancestry differences were estimated by principal components analysis (PCA) using EIGENSTRAT software, and the outliers identified by the first ten principal components (PCs) were removed.

After pre-imputation quality control, 836 individuals (457 males, 379 females) with coverage of 1,349,769 SNPs passed the filter thresholds. Filtered data were phased according to the Haplotype Reference Consortium Release 1.1 (HRC.r1-1) through the Wellcome Sanger Institute Imputation Service (<https://www.sanger.ac.uk/tool/sanger-imputation-service/>) adopting the Eagle method (version 2.4.1). Imputation analysis generated ~ 39,000,000 variants. Post-imputation QC was performed using QCTOOL (version 2.0.8) and SNPTEST (version 2.5.6) software. The quality of the inferred variants was estimated according to the following thresholds: INFO score > 0.6, average posterior probability (APP) > 0.9, MAF > 0.01, and Hardy-Weinberg disequilibrium >  $1 \times 10^{-6}$ . After post-imputation quality control, 7,635,605 SNPs remained for further analysis.

## Whole-genome sequencing in the replication dataset

*C9orf72* carriers (n=456) from Project MinE were whole-genome sequenced, and standard quality control criteria were applied. At the variant level, sites with a genotype quality (GQ) < 10 or missing and SNVs and indels with quality (QUAL) scores < 20 and < 30 were removed. Kinship coefficients (i.e., relatedness) were calculated using the KING method, as implemented in the *SNPRelate* package in R. All pairs of related individuals (kinship > 0.0625) were identified. The transition-transversion ratio in each sample was calculated using SnpSift27 (version 4.3p). The expected transition-transversion (Ti/Tv) ratio in whole-genome sequence data is ~2.0. Samples with a Ti/Tv ratio  $\pm 6$  SD from the entire distribution of samples were removed. The number of single nucleotide variants (SNV) and singletons was calculated per sample. Samples with total SNVs or singletons > 6 SD from the mean were removed.

The transition in sequencing platforms from HiSeq 2000 to HiSeq X caused an increase in observed indels per sample. Accordingly, samples were filtered by platform (HiSeq 2000 or HiSeq X) and were excluded if the number of indels was  $\pm 6$  SD from the mean of their respective group. After this step, the average sample depth was calculated again. It was higher for samples sequenced on the HiSeq 2000 (35X, on average) than for samples sequenced on the HiSeq X (25X, on average). However, no samples were removed at this step.

Samples with mismatched sex information or missing phenotypic information were excluded. The remaining sample quality control was performed on high-quality variants: multi-allelic SNVs, variants with missingness > 2%, variants with Hardy-Weinberg equilibrium p-value <  $1 \times 10^{-5}$ , variants with differential missingness between cases, and controls with p-value <  $1 \times 10^{-5}$  were removed. The final steps of sample quality control were performed on a set of variants with an MAF > 10%, SNP missingness < 0.1%, variants residing outside four complex regions (the major histocompatibility complex (MHC) on chromosome 6; the lactase locus (LCT) on chromosome 2; and inversions on chromosomes 8 and 17). A/T and C/G variants were also excluded. We used the SNVs to calculate observed and expected autosomal homozygous genotype counts for each sample, and they were removed if  $|F| > 0.1$ . Samples with a PI\_HAT > 0.8 were excluded to avoid duplicated samples.

Principal component analysis, as implemented in EIGENSOFT, was used to visualize potential structure in the data induced by population stratification or other variables. Projections onto the HapMap3 and the 1000 Genomes (phase 3, version 5) populations indicated that the samples were primarily of European ancestry. However, some were of African or East Asian ancestries, while others appeared admixed. Outliers from the European population (HapMap3: > 10 SD on principal components (PC) 1-4, 1000 Genomes: > 4 SD on PCs 1-4) were excluded from further analyses.

All samples were sent in batches to Illumina for sequencing. Thus, all variants were regressed against batch using PLINK (version 1.9) [S9]. Finally, all variants with an association p-value <  $1.0 \times 10^{-10}$  in at least one batch were excluded.

## New York Genome Center RNA sequencing

Patient and control samples were acquired from the New York Genome Center (NYGC) Consortium Database and can be accessed by contacting the NYGC at <https://www.nygenome.org/contact/>. *Trimmomatic* software was used to trim the original sequencing files obtained from NYGC to 80 base pairs to remove barcodes and improve sample quality [S10]. To account for sample sequencing depth differences, the reads from all samples were downsampled to 25 million reads. These reads were aligned to the hg38 reference genome ([https://www.ncbi.nlm.nih.gov/assembly/GCF\\_000001405.26/](https://www.ncbi.nlm.nih.gov/assembly/GCF_000001405.26/)) with the *Spliced Transcripts Alignment to a Reference* (STAR) software [S11].

These raw mRNA transcript counts were collated into a single count matrix file for differential expression analysis (DEA). First, samples in the count matrix file collected from the motor cortex were selected. Next, genes with a low number of transcript counts (5 or less) were removed, as well as those that were

significantly associated with biological sex (DESeq2 FDR adjusted p-value < 0.05). The NYGC provided information regarding which patients had a pathogenic *C9orf72* expansion. The number of patients with a pathogenic *C9orf72* expansion only (i.e., no other known genetic predisposition to ALS) was 36. The DEA was performed on the resulting non-normalized count data matrix using the *DESeq2* package in R to compare the expression profiles of *C9orf72* ALS patients and controls [S12]. Differentially expressed genes (DEGs) were counted with a Bonferroni adjusted p-value < 0.05.

### Individual-level variant analysis

We evaluated associations of the rs113247976 (*KIF5A*) variant with age at onset using linear regression models adjusted for sex and principal components one to ten. The variant was studied under an additive genotypic and a dominant genotypic model.

### Induced pluripotent stem cells (iPSCs) maintenance and differentiation into motor neurons

Differentiation of iPSCs (**Table S10**) into motor neurons was performed as previously described with modifications [S13]. For the differentiation, induced pluripotent stem cells (iPSCs) were seeded in growth factor-reduced Matrigel-coated plates (0.1 µg/ml). On day zero, iPSCs at 100% confluence were washed once with PBS. Neuralization was initiated by switching to iPSC-NPC day 1-6 differentiation media (containing 50% KnockOut DMEM/F-12, 50% neurobasal medium, 0.5× N2 supplement, 0.5× B27 supplement, 1× GlutaMAX, 1% penicillin/streptomycin; this will be referred as a basal medium) supplemented with 2 µM dorsomorphin homolog 1 (DMH1), 2 µM SB431542, 3 µM CHIR (a GSK3 inhibitor), which was replaced every 24 hours. On day 7 of the differentiation, cells were switched to day 7-12 iPSC-NPC differentiation media (which contains basal medium, supplemented with 1 µM CHIR, 2 µM DMH1, 2 µM SB431542, 0.1 µM all-*trans* retinoic acid, and 0.5 µM purmorphamine (PMN)). For the passage, cells were washed with HBSS without calcium and magnesium and incubated for 7 minutes with Accutase at 37°C. Accutase was neutralized with double the medium quantity, and the cell suspension was centrifuged at 200 g for 4 minutes. The supernatant was discarded, and the cell pellet was resuspended in 7-12 iPSC-NPC differentiation media supplemented with 10µM Y27632 ROCK inhibitor. Cells were re-plated onto new matrigel-coated 6-well plates at a ratio of 1:1, and differentiation was continued. By day 12 of the differentiation, neural rosettes should have formed, and the cells should express classical neural progenitor cell (NPC) markers (Pax6, Nestin).

For the motor neuron differentiation, NPCs were plated in Matrigel-coated 6-well plates at a density of  $7 \times 10^5$  cells per well. After 24 hours of incubation, the medium was changed to basal medium supplemented with 0.5 µM all-*trans* retinoic acid and 0.1 µM PMN, and the medium was changed every day for six days. On day 19, the motor neuron progenitors were passaged with accutase onto matrigel-coated plates. The medium was replaced with basal medium supplemented with 0.5 µM all-*trans* retinoic acid, 0.1 µM PMN, 0.1 µM compound E (Cpd E), 10 ng/mL BDNF, 10 ng/mL CNTF, and 10 ng/mL IGF-1 (19-28 days medium) and seeded into an optic 96-well plate (Perkin Elmer) for staining, at a density of  $2 \times 10^4$  cells per well. On day 29 of the differentiation, the cells were switched to day 29-40 neuronal differentiation medium (which contains Neurobasal basal medium, supplemented with 1x of B27, 10 ng/mL BDNF, 10 ng/mL CNTF, and 10 ng/mL IGF-1). The cells were fed on alternate days with the neuronal medium until day 40. Cells were previously characterized at day 40 of differentiation and were found to express classical mature motor neuron markers (ChAT, SMI32, Islet 1/2, MAP2, NeuN) (**Figure S5**).

### Drug Treatments

Acamprosate was obtained from Sigma-Aldrich (acamprosate calcium A6981), stored at 10 mM in dH<sub>2</sub>O, and kept out of light at -20°C until use. To evaluate the effect of acamprosate on neuronal survival, on day 40, motor neurons were treated with acamprosate (0.01-30 µM) diluted in 29-40 neuronal differentiation medium for 72 hours. As a positive control for cell death, motor neurons were treated with 2 µM

camptothecin (CPT) made up in day 29-40 neuronal differentiation medium for 1 hour at 37°C. Control cultures were treated with dH<sub>2</sub>O, the vehicle of dilution of acamprosate.

### Apoptosis assessment

On day 40, motor neurons were treated with the selected drugs. After three days of treatment, motor neurons were fixed and stained for (i) active Caspase-3 to identify cells undergoing apoptosis and (ii) MAP2, a neuron-specific cytoskeletal protein, to define the cytoplasmic boundaries of cells. 4,6-diamidino-2-phenylindole (DAPI) was used for nuclear counterstain. Quantitative imaging analysis was conducted through the Opera Phenix high content Screening System at 40x magnification, using the Harmony software for analysis. The percentage of Caspase-3 positive cells and the number of fragmented nuclei were assessed per every condition. At least 25 fields were randomly selected and scanned per well of a 96-well plate in triplicate. To identify and remove any false readings generated by the system, three random treated and untreated wells were selected and counted manually (blind to the group).

### Immunocytochemistry

Cells were washed with PBS and incubated with 4% paraformaldehyde warmed to approximately 37°C for 10 minutes at room temperature, then washed with PBS. Fixed motor neurons were permeabilized with 0.3% Triton X-100 in PBS for 5 minutes and incubated in 5% donkey serum blocking solution for 1 hour to block non-specific staining. Antibodies were diluted in 5% donkey serum. Cells were incubated with primary antibodies (**Table S11**) overnight at 4°C and washed three times with PBS (5 minutes per wash). Cells were incubated with AlexaFluor secondary antibodies (1:400 dilution) (**Table S11**) for 1 hour at room temperature in the dark. They were washed once with PBS before incubating in 1 µg/mL of DAPI for 5 minutes at room temperature in the dark. Cells were washed three times with PBS and stored in the dark at 4°C until imaging.

### Imaging

All the imaging was performed using the Opera Phenix™ High Content Screening System (Perkin Elmer) at × 40 magnification to allow high throughput analysis without experimental bias. Z-stacks of at least eight or more planes separated by 0.7 µm were obtained from a minimum of 25 fields per well from three technical replicate wells per experiment, thus assessing > 6000 cells per experiment. 405, 488, 594, and 647nm lasers, and the appropriate excitation and emission filters were used. Settings were kept consistent while taking images from all cultures. For active caspase-3 analysis, the total number of caspase-3 positive cells was counted using the automated image analysis software Harmony (Perkin Elmer) and divided by the total number of cells.

### MTT assay

The effect of acamprosate on cell viability was assessed via 3-(4,5-dimethylthiazol-2-yl)-2,5-diphenyl-2H-tetrazolium bromide (MTT) assay. This colorimetric assay is based on the reduction of a yellow tetrazolium salt (3-(4,5-dimethylthiazol-2-yl)-2,5-diphenyltetrazolium bromide to purple formazan crystals by metabolically active cells. For this assay, motor neurons were seeded in clear 96-well plates, treated with different acamprosate concentrations, and incubated for 72 hours at 37°C. Motor neurons were treated with 2 µM camptothecin (CPT) as a positive control for cell death. After incubation, the media was removed, and the cells were washed with PBS (100µl per well). MTT solution was then added to a final concentration of 0.5 mg/mL and incubated at 37°C for 2 hours to allow the formation of formazan crystals. The cells were washed with PBS, and DMSO was added (100µl per well) to dissolve the formazan crystals. The plates were shaken for 10 minutes to lyse the cells. Plate absorbance was read

at 570nm in a PherAstar plate reader. The percentage of cell viability was normalized to the vehicle group.



SUPPLEMENTARY FIGURES

**Figure S1. The sporadic ALS genetic risk influenced the age at onset among ALS *C9orf72* and FTD *C9orf72* carriers, related to Figure 3.**

(A) The regression line shows the association between ALS genetic risk score and age at onset among 817 ALS/FTD patients carrying *C9orf72* repeat expansions (p-value = 0.024, beta = -0.765, 95% CI = -1.429 – -0.101) (ALS & FTD group), 666 ALS patients carrying *C9orf72* repeat expansions (p-value = 0.028, beta = -0.815, 95% CI = -1.54 – -0.09) (ALS group), and 151 FTD patients carrying *C9orf72* repeat expansions (p-value = 0.705, beta = -0.333, 95% CI = -2.06 – 1.39) (FTD group). The shadow areas represent the 90% confidence interval of the regression model. (B) The forest plot shows the meta-analysis results of the ALS and FTD groups (p-value 0.029, beta = -0.742, 95% CI = -1.412– -0.072).

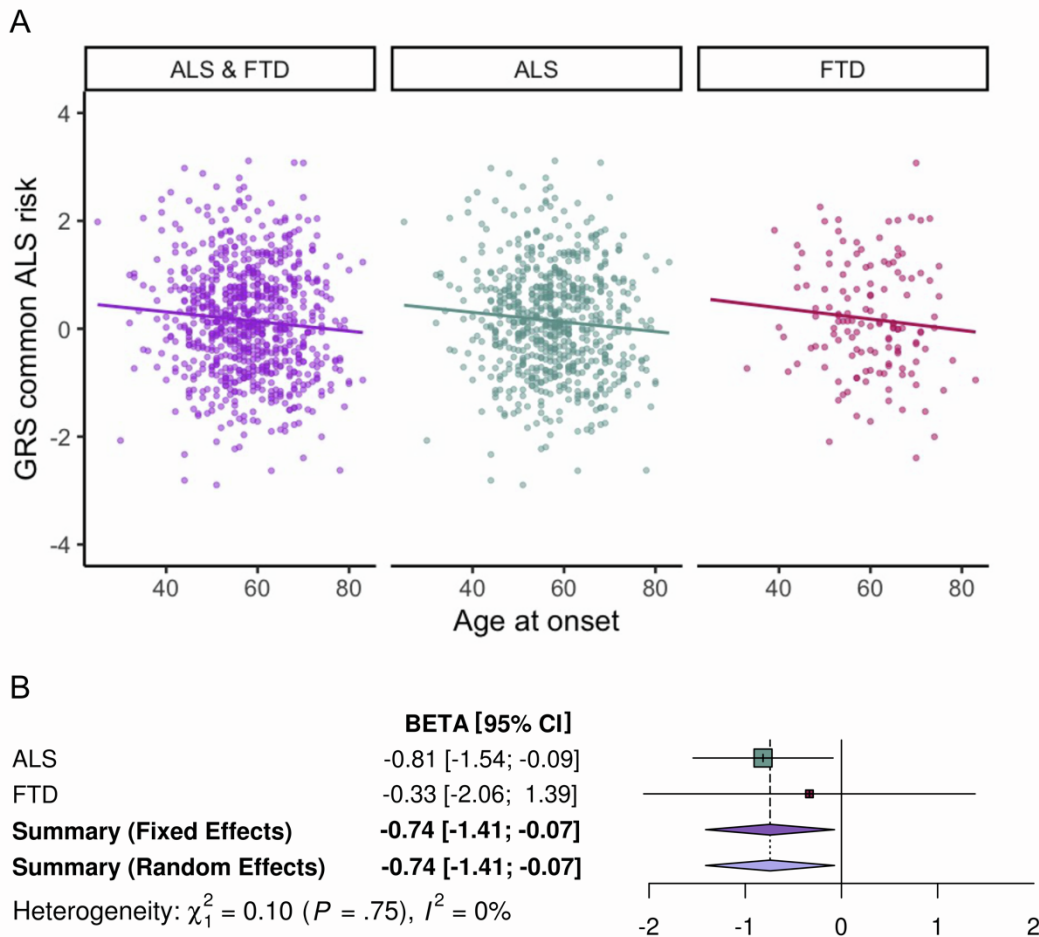

**Figure S2. The sporadic ALS genetic risk score did not influence age at onset among patients without the *C9orf72* repeat expansion, related to Figure 3.**

The regression line shows the lack of association between ALS genetic risk score and age at onset in 7,037 ALS patients without *C9orf72* repeat expansions (p-value = 0.437, beta = 0.115, 95% CI = -0.175-0.404). The shadow areas represent the 99% confidence interval of the regression model. The forest plot shows the regression result and the 95% confidence interval.

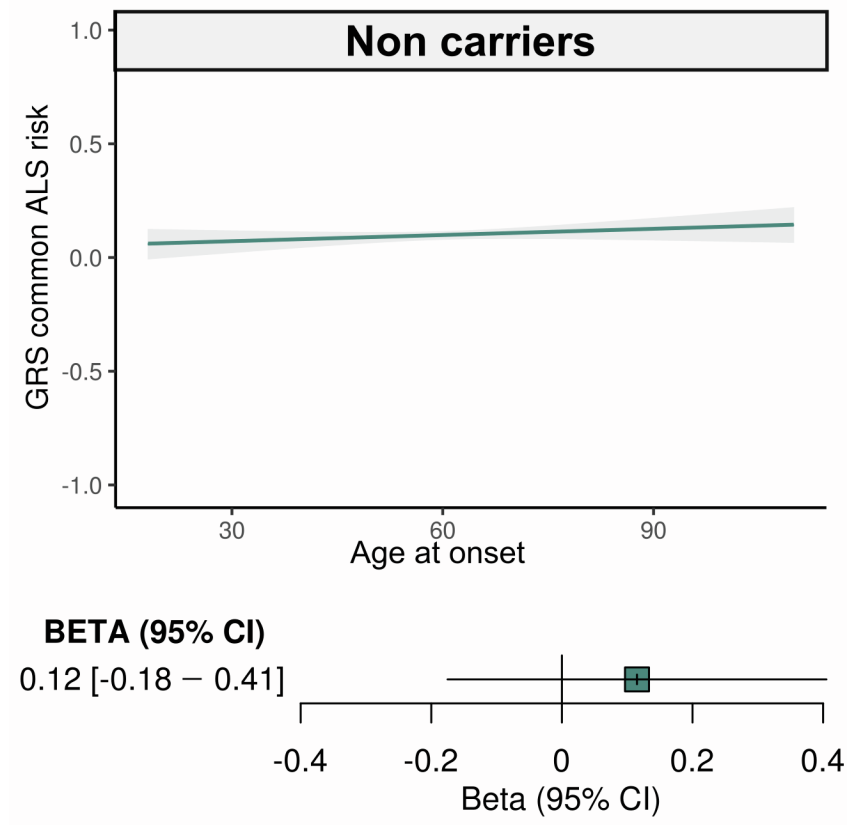

**Figure S3. A schematic illustration of the leave-one-out analysis and decile calculation, related to Figure 4.**

Leave-one-out analyses were performed by excluding one variant from the ALS genetic risk score analysis (based on 161 predictors) and re-estimating the causal effect on age at the onset of the remaining 160 variants. The variants were ordered based on their impact on age at onset, and ten ranked deciles, each containing 16 SNPs, were generated. Scores were recalculated using the deciles, and regression analysis evaluated the contribution of the 16 variants within each decile to age at onset.

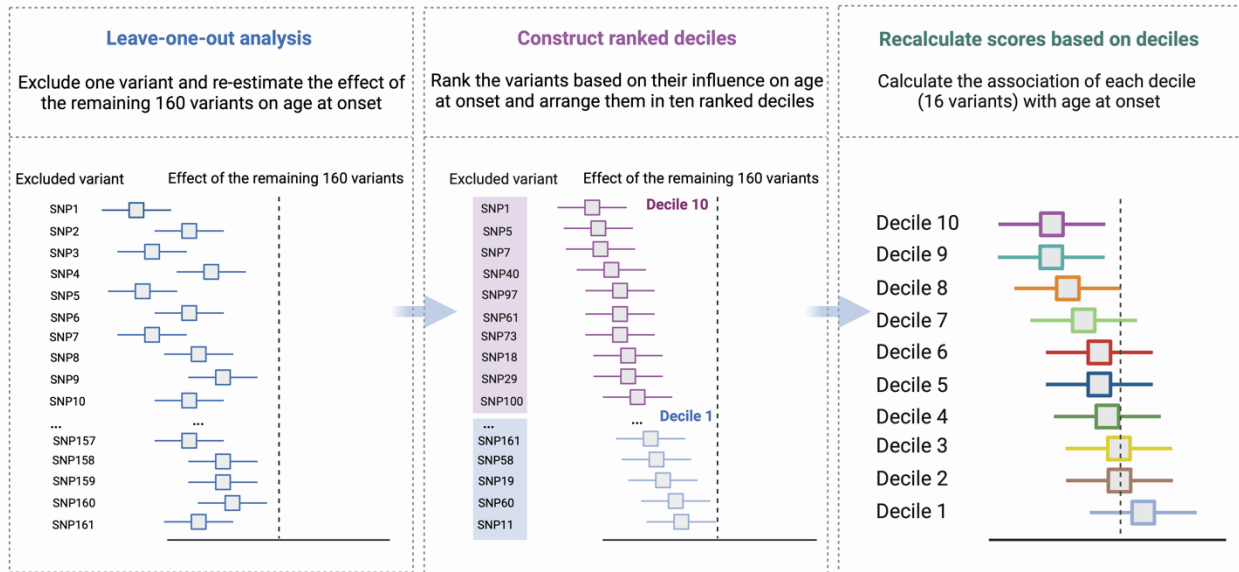

**Figure S4. The genetic risk score of each decile showed no relationship to age of symptom onset among the ALS cases who did not carry the *C9orf72* expansion, related to Figure 4.**

The Forest plot shows the effect estimates of the genetic risk score on age at onset in ALS non-*C9orf72* cases based on deciles obtained from the leave-one-out analysis. It also shows the regression results and the 95% confidence interval per decile. The analysis was performed in 7,037 ALS patients without *C9orf72* repeat expansions.

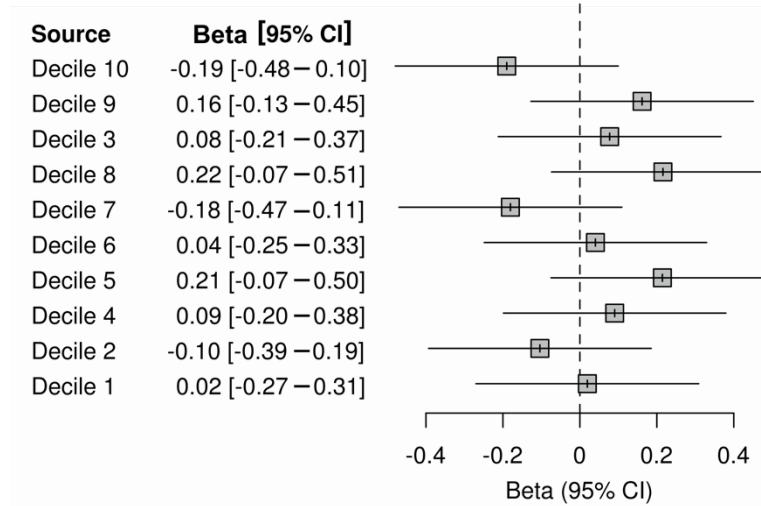

**Figure S5. Enrichment analysis of the decile ten genes identified pathways influencing the age of onset among *C9orf72* carriers, related to Figure 4.**

Twelve out of sixteen variants within decile ten are mapped to genes based on genomic coordinates. These genes were used for enrichment analysis based on Gene Ontology (GO) terms, including biological processes, molecular functions, and KEGG pathways.

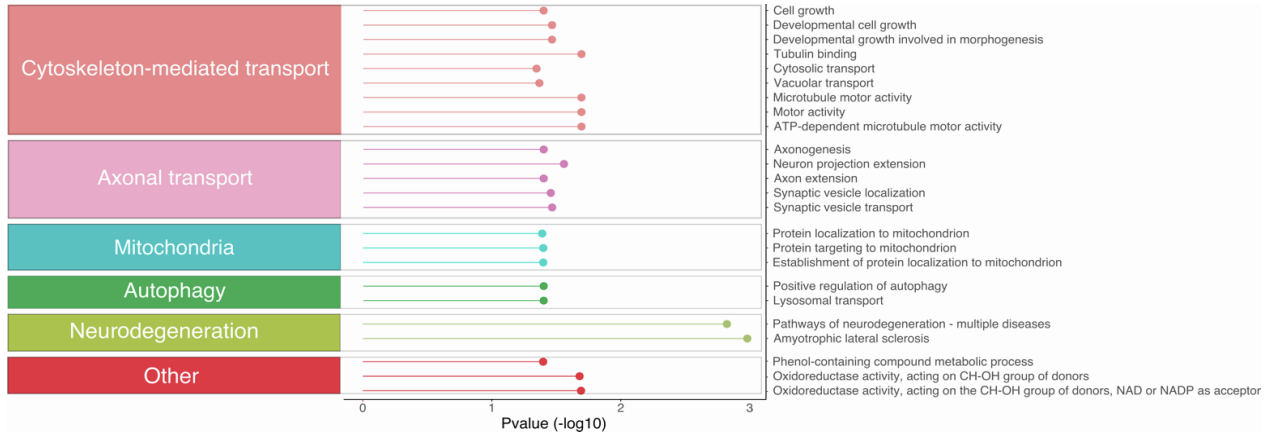

**Figure S6. The cell lines displayed characteristics of motor neurons, related to Figure 6.**

The picture shows motor neurons derived from unaffected controls (control), *C9orf72* ALS patients (ALS-*C9orf72*), and an isogenic control line (ISO-*C9orf72*). Chat, Choline acetyltransferase; DAPI, 4',6-diamidino-2-phenylindole; Islet 1/2, ISL LIM Homeobox 1/2; MAP2, Microtubule-associated protein 2; NeuN, neuronal nuclei antigen; SMI, neurofilament H; and TUJ, beta-tubulin III. The nuclei were counterstained with DAPI (Blue). Scale bar, 50  $\mu$ m.

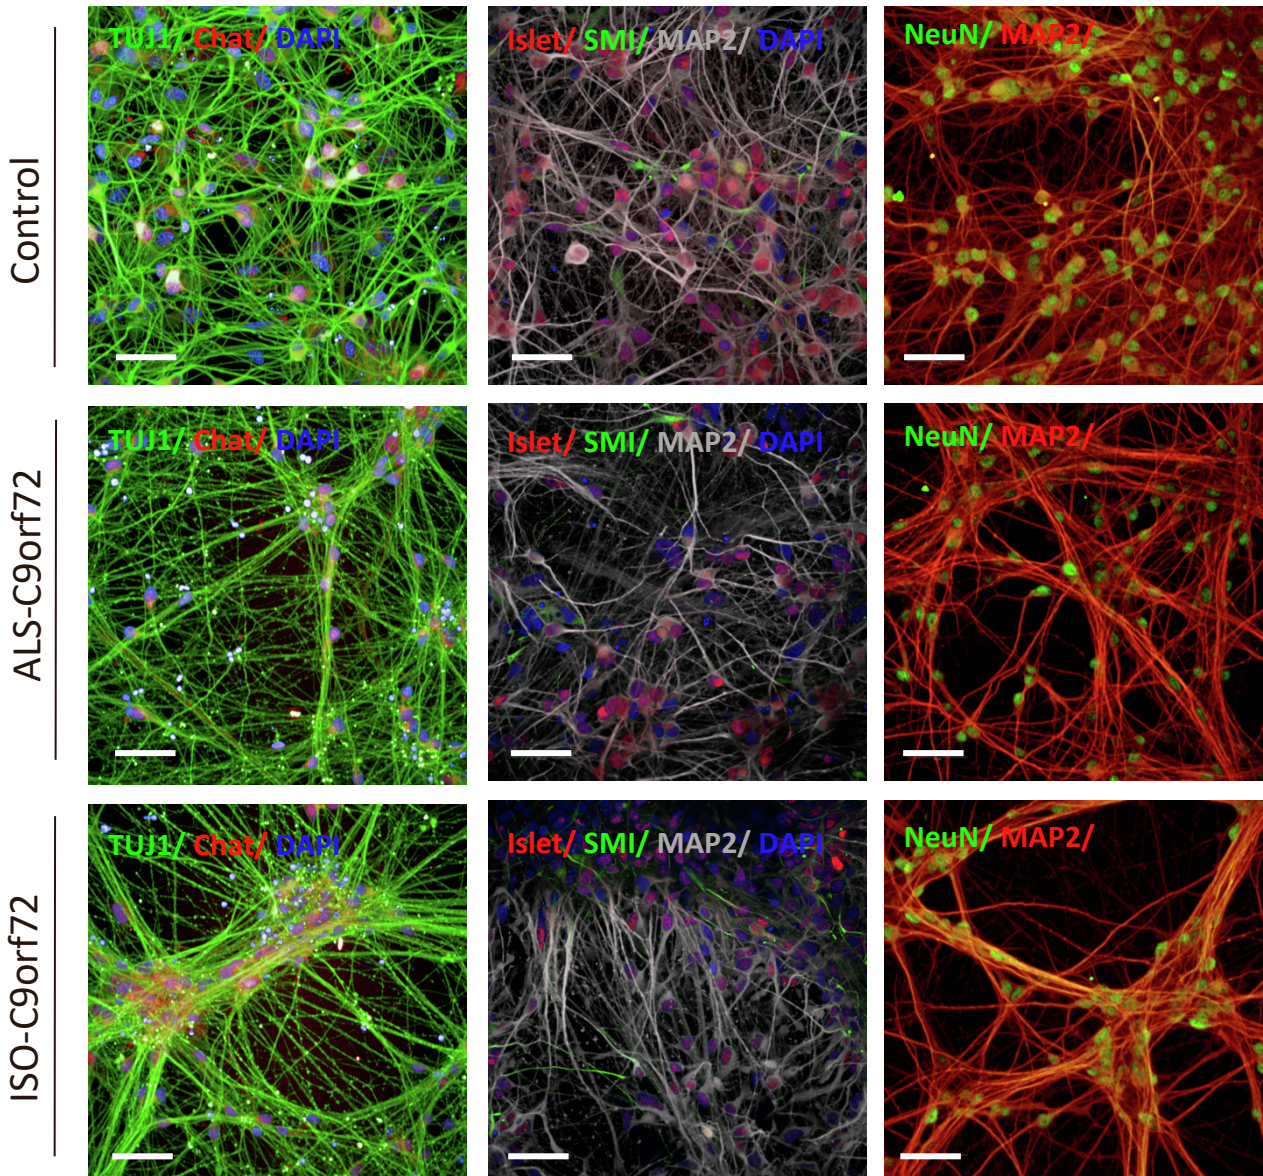

**Figure S7. Acamprosate showed no evidence of toxicity in healthy-derived motor neurons, related to Figure 6.**

Data are shown as the percentage of viable cells normalized to the vehicle (water). After 72 hours of treatment, acamprosate was not toxic for iPSC-derived motor neurons from two healthy donors. Camptothecin (CPT), an apoptosis inducer, was used as a positive control of cell death. The comparison was performed using one-way ANOVA. Each dot represents a technical replicate, and the data were pooled from two motor neuron lines to calculate the means and standard deviations.

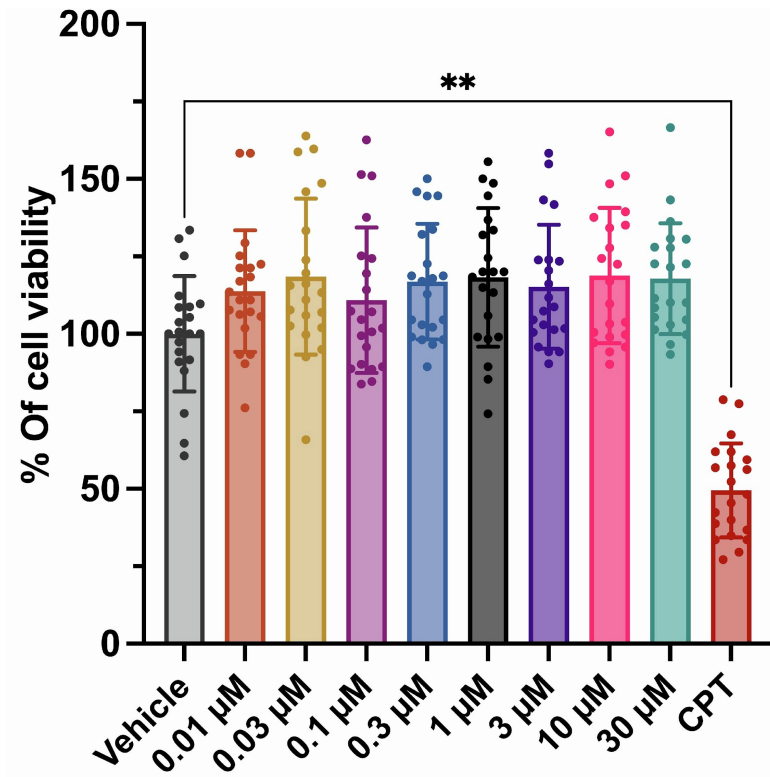

**Figure S8. Acamprosate showed no evidence of toxicity in ALS-derived motor neurons, related to Figure 6.**

Data are shown as the percentage of viable cells normalized to the vehicle (water). Acamprosate was not toxic in two iPSC-derived motor neuron cell lines derived from ALS patients carrying *C9orf72* expansion after 72 hours of treatment. The lines used were CS52iALS-C9nxx and CS28iALS-C9nxx; more information is listed in Table S10. Camptothecin (CPT), an apoptosis inducer, was used as a positive control of cell death. The comparison was performed using one-way ANOVA. Each dot represents a technical replicate, and the data were pooled to calculate the means and standard deviations.

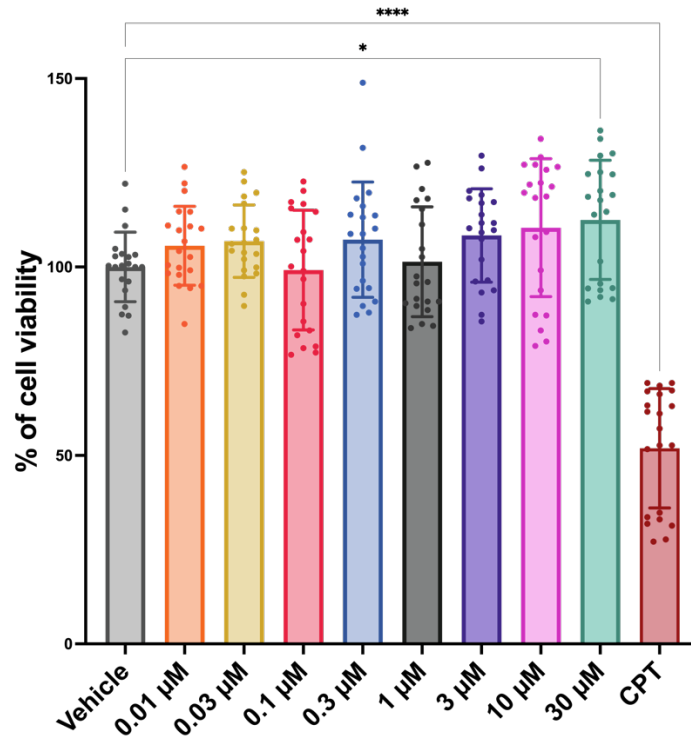



**Figure S9. The dose-response curve of acamprosate in ALS-derived motor neurons showed a neuroprotective effect, related to Figure 6.**

Dose-response curve and half maximal effective concentration ( $EC_{50} = 0.271 \mu\text{M}$ , 95% CI = 0.0218 – 2.95) of acamprosate in *C9orf72* ALS-derived motor neurons. The dose-response curve illustrates the effect of increasing concentrations of acamprosate (x-axis) on the survival of two different lines of *C9orf72*-carrying motor neurons (y-axis). For each line, data were averaged across three biological replicates, with three technical replicates for each one. Data are means  $\pm$  standard deviations.

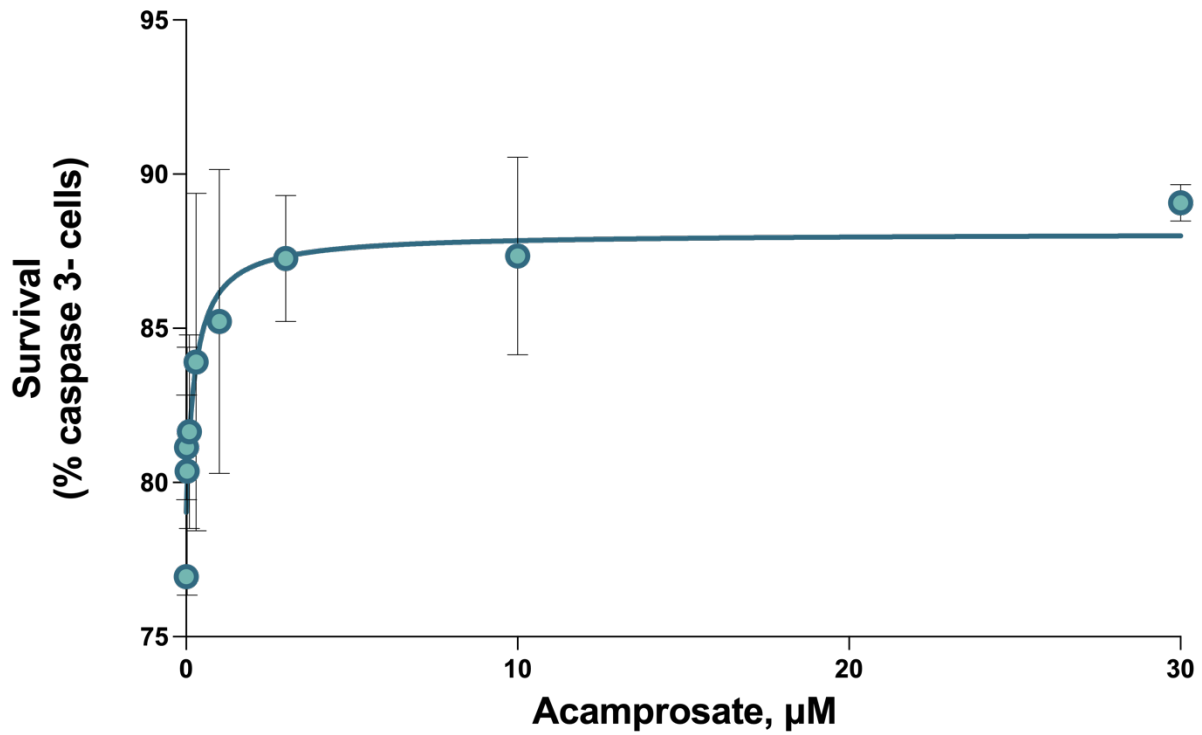

**SUPPLEMENTARY TABLES**

**Table S1. The ALS genetic risk profile was based on 161 SNPs, related to Figure 2.**

The polygenic risk score was generated using genetic data from Van Rheenen et al., 2016 [S14]. EA, effect allele; Chr, chromosome; Pos, position in build hg 38.

| rsID        | Chr | Pos (hg38) | EA | Gene names             | Beta   | P-value                |
|-------------|-----|------------|----|------------------------|--------|------------------------|
| rs10938692  | 4   | 8116834    | T  | <i>ABLIM2</i>          | -0.079 | 2.74x10 <sup>-5</sup>  |
| rs12369156  | 12  | 120729872  | A  | <i>ACADS</i>           | 0.261  | 7.17x10 <sup>-6</sup>  |
| rs116488199 | 10  | 1675116    | A  | <i>ADARB2</i>          | 0.132  | 8.83x10 <sup>-5</sup>  |
| rs1159918   | 4   | 99321852   | A  | <i>ADH1B</i>           | -0.080 | 2.03x10 <sup>-5</sup>  |
| rs320019    | 1   | 48610454   | A  | <i>AGBL4</i>           | -0.078 | 6.75x10 <sup>-5</sup>  |
| rs73103977  | 12  | 53513226   | T  | <i>ATF7</i>            | -0.251 | 1.78x10 <sup>-5</sup>  |
| rs11065961  | 12  | 111585263  | A  | <i>ATXN2</i>           | -0.083 | 5.81x10 <sup>-5</sup>  |
| rs6737916   | 2   | 32372917   | A  | <i>BIRC6</i>           | 0.121  | 2.59x10 <sup>-5</sup>  |
| rs75087725  | 21  | 44333234   | A  | <i>CFAP410</i>         | 0.479  | 8.65x10 <sup>-11</sup> |
| rs10067826  | 5   | 10282407   | A  | <i>CMBL</i>            | -0.143 | 4.21x10 <sup>-5</sup>  |
| rs10443173  | 1   | 86068071   | A  | <i>COL24A1</i>         | -0.106 | 7.95x10 <sup>-6</sup>  |
| rs2271689   | 10  | 17046273   | A  | <i>CUBN</i>            | -0.090 | 9.43x10 <sup>-5</sup>  |
| rs6947666   | 7   | 137708989  | A  | <i>DGKI</i>            | 0.333  | 4.92x10 <sup>-5</sup>  |
| rs10876069  | 12  | 50599395   | T  | <i>DIP2B</i>           | 0.072  | 8.51x10 <sup>-5</sup>  |
| rs62073477  | 17  | 78448064   | T  | <i>DNAH17</i>          | 0.102  | 4.65x10 <sup>-5</sup>  |
| rs77238283  | 17  | 11797907   | T  | <i>DNAH9</i>           | 0.167  | 6.95x10 <sup>-5</sup>  |
| rs35059420  | 5   | 169995487  | A  | <i>DOCK2</i>           | -0.159 | 6.05x10 <sup>-5</sup>  |
| rs1442671   | 18  | 69528820   | A  | <i>DOK6</i>            | 0.078  | 4.60x10 <sup>-5</sup>  |
| rs7764458   | 6   | 83116819   | T  | <i>DOPIA</i>           | 0.121  | 5.74x10 <sup>-5</sup>  |
| rs11608027  | 11  | 34492865   | T  | <i>ELF5</i>            | 0.123  | 3.05x10 <sup>-5</sup>  |
| rs17171046  | 7   | 37438260   | T  | <i>ELMO1</i>           | 0.116  | 3.70x10 <sup>-5</sup>  |
| rs9901522   | 17  | 14770617   | T  | <i>ENSG00000205325</i> | 0.146  | 4.61x10 <sup>-5</sup>  |
| rs11185388  | 1   | 104198732  | T  | <i>ENSG00000215869</i> | -0.070 | 9.25x10 <sup>-5</sup>  |
| rs2893656   | 7   | 106534655  | A  | <i>ENSG00000243797</i> | 0.070  | 8.87x10 <sup>-5</sup>  |
| rs3798105   | 5   | 133194937  | T  | <i>ENSG00000248245</i> | 0.075  | 9.76x10 <sup>-5</sup>  |
| rs4273590   | 5   | 159335610  | A  | <i>ENSG00000249738</i> | -0.191 | 9.59x10 <sup>-5</sup>  |
| rs118072482 | 8   | 138017250  | T  | <i>ENSG00000253288</i> | 0.297  | 8.11x10 <sup>-5</sup>  |
| rs72973932  | 11  | 74400615   | A  | <i>ENSG00000254631</i> | 0.182  | 9.56x10 <sup>-5</sup>  |
| rs117219925 | 12  | 23142104   | A  | <i>ENSG00000256995</i> | -0.318 | 7.15x10 <sup>-5</sup>  |
| rs111704832 | 15  | 93374070   | T  | <i>ENSG00000257060</i> | -0.155 | 1.80x10 <sup>-5</sup>  |
| rs11171999  | 12  | 56846925   | A  | <i>ENSG00000258679</i> | 0.077  | 8.21x10 <sup>-5</sup>  |
| rs6603044   | 15  | 83015059   | T  | <i>ENSG00000259805</i> | -0.079 | 1.08x10 <sup>-5</sup>  |
| rs56024498  | 16  | 76893238   | A  | <i>ENSG00000259995</i> | -0.070 | 8.18x10 <sup>-5</sup>  |
| rs12991146  | 2   | 59884087   | A  | <i>ENSG00000271955</i> | -0.170 | 6.05x10 <sup>-5</sup>  |
| rs144476584 | 9   | 23029711   | T  | <i>ENSG00000284418</i> | 0.270  | 7.46x10 <sup>-5</sup>  |
| rs116876275 | 13  | 65954214   | T  | <i>ENSG00000286395</i> | -0.287 | 8.80x10 <sup>-5</sup>  |

|             |    |           |   |                      |        |                       |
|-------------|----|-----------|---|----------------------|--------|-----------------------|
| rs538622    | 5  | 172920676 | A | <i>ERGIC1</i>        | 0.079  | 1.33x10 <sup>-5</sup> |
| rs2985994   | 13 | 45539849  | T | <i>ERICH6B</i>       | -0.081 | 6.17x10 <sup>-5</sup> |
| rs7930973   | 11 | 44159478  | A | <i>EXT2</i>          | 0.076  | 2.27x10 <sup>-5</sup> |
| rs72792226  | 10 | 48204534  | T | <i>FRMPD2</i>        | 0.285  | 1.36x10 <sup>-5</sup> |
| rs9903355   | 17 | 36580791  | T | <i>GGNBP2</i>        | -0.081 | 5.29x10 <sup>-6</sup> |
| rs7258235   | 19 | 2612120   | A | <i>GNG7</i>          | -0.156 | 1.48x10 <sup>-5</sup> |
| rs112820958 | 5  | 79465868  | T | <i>HOMER1</i>        | 0.148  | 4.75x10 <sup>-5</sup> |
| rs11718653  | 3  | 122759011 | T | <i>HSPBAP1</i>       | 0.221  | 8.75x10 <sup>-6</sup> |
| rs144049425 | 2  | 162505368 | T | <i>KCNH7</i>         | -0.251 | 7.80x10 <sup>-5</sup> |
| rs113247976 | 12 | 57581917  | T | <i>KIF5A</i>         | 0.288  | 1.13x10 <sup>-5</sup> |
| rs61954176  | 13 | 40198035  | T | <i>LINC00598</i>     | -0.096 | 5.32x10 <sup>-6</sup> |
| rs11695294  | 2  | 176608890 | A | <i>LINC01117</i>     | 0.108  | 5.27x10 <sup>-5</sup> |
| rs28407220  | 2  | 33816106  | T | <i>LINC01320</i>     | 0.103  | 7.11x10 <sup>-6</sup> |
| rs150278778 | 1  | 209379025 | A | <i>LINC01698</i>     | -0.254 | 4.82x10 <sup>-5</sup> |
| rs72733862  | 5  | 8446181   | A | <i>LINC02226</i>     | 0.148  | 6.08x10 <sup>-6</sup> |
| rs35318094  | 5  | 180245984 | T | <i>MAPK9</i>         | 0.184  | 1.15x10 <sup>-5</sup> |
| rs17326496  | 5  | 113340882 | T | <i>MCC</i>           | -0.091 | 5.54x10 <sup>-5</sup> |
| rs79502718  | 18 | 50919413  | A | <i>ME2</i>           | 0.169  | 9.23x10 <sup>-5</sup> |
| rs12972250  | 19 | 329746    | A | <i>MIER2</i>         | 0.073  | 6.10x10 <sup>-5</sup> |
| rs9653747   | 21 | 18669100  | A | <i>MIR548XHG</i>     | -0.088 | 4.64x10 <sup>-6</sup> |
| rs12079484  | 1  | 181048307 | A | <i>MR1</i>           | 0.075  | 7.81x10 <sup>-5</sup> |
| rs2240601   | 17 | 57673751  | A | <i>MSI2</i>          | -0.090 | 5.07x10 <sup>-5</sup> |
| rs4292737   | 8  | 10401605  | A | <i>MSRA</i>          | 0.073  | 5.11x10 <sup>-5</sup> |
| rs4945276   | 11 | 78453938  | T | <i>NARS2</i>         | 0.076  | 5.90x10 <sup>-5</sup> |
| rs150949995 | 5  | 150518937 | T | <i>NDST1</i>         | 0.373  | 4.28x10 <sup>-6</sup> |
| rs642811    | 11 | 78053929  | T | <i>NDUFC2-KCTD14</i> | 0.085  | 7.08x10 <sup>-5</sup> |
| rs34432311  | 2  | 177346958 | T | <i>NFE2L2</i>        | -0.207 | 3.20x10 <sup>-5</sup> |
| rs68072647  | 17 | 9224590   | A | <i>NTN1</i>          | -0.077 | 2.65x10 <sup>-5</sup> |
| rs12886280  | 14 | 31829453  | T | <i>NUBPL</i>         | -0.083 | 3.15x10 <sup>-6</sup> |
| rs118036547 | 15 | 27863948  | T | <i>OCA2</i>          | 0.251  | 4.49x10 <sup>-5</sup> |
| rs35346557  | 3  | 190120229 | T | <i>P3H2</i>          | -0.090 | 4.92x10 <sup>-5</sup> |
| rs3109207   | 4  | 168675360 | A | <i>PALLD</i>         | 0.071  | 9.49x10 <sup>-5</sup> |
| rs36037136  | 1  | 164710739 | A | <i>PBX1</i>          | -0.291 | 1.72x10 <sup>-5</sup> |
| rs10492593  | 13 | 66919985  | A | <i>PCDH9</i>         | 0.123  | 2.89x10 <sup>-5</sup> |
| rs2477866   | 1  | 233152025 | A | <i>PCNX2</i>         | -0.140 | 3.02x10 <sup>-5</sup> |
| rs16865645  | 2  | 177696567 | T | <i>PDE11A</i>        | 0.096  | 9.42x10 <sup>-5</sup> |
| rs5766195   | 22 | 44921429  | T | <i>PHF21B</i>        | -0.072 | 4.36x10 <sup>-5</sup> |
| rs11652752  | 17 | 67379776  | A | <i>PITPNC1</i>       | -0.119 | 6.49x10 <sup>-5</sup> |
| rs8053191   | 16 | 81117558  | T | <i>PKDIL2</i>        | -0.152 | 6.50x10 <sup>-5</sup> |
| rs10430614  | 10 | 131935136 | T | <i>PPP2R2D</i>       | -0.079 | 6.04x10 <sup>-5</sup> |
| rs9355960   | 6  | 161901879 | T | <i>PRKN</i>          | -0.084 | 1.37x10 <sup>-5</sup> |
| rs2253050   | 16 | 74040378  | T | <i>PSMD7-DT</i>      | 0.173  | 7.43x10 <sup>-5</sup> |
| rs28660489  | 12 | 64560784  | A | <i>RASSF3</i>        | -0.081 | 6.13x10 <sup>-5</sup> |

|             |    |           |   |                 |        |                       |
|-------------|----|-----------|---|-----------------|--------|-----------------------|
| rs12229321  | 12 | 64518074  | T | <i>RASSF3</i>   | 0.071  | 8.42x10 <sup>-5</sup> |
| rs9813285   | 3  | 29329178  | T | <i>RBMS3</i>    | -0.077 | 2.42x10 <sup>-5</sup> |
| rs6683585   | 1  | 240967882 | T | <i>RGS7</i>     | -0.068 | 9.16x10 <sup>-5</sup> |
| rs143747467 | 16 | 11367549  | T | <i>RMI2</i>     | -0.293 | 1.37x10 <sup>-5</sup> |
| rs115348904 | 4  | 158390602 | T | <i>RXFP1</i>    | -0.208 | 5.48x10 <sup>-5</sup> |
| rs2294928   | 22 | 43986973  | A | <i>SAMM50</i>   | 0.104  | 4.27x10 <sup>-5</sup> |
| rs35714695  | 17 | 28392769  | A | <i>SARM1</i>    | -0.134 | 1.29x10 <sup>-8</sup> |
| rs10139154  | 14 | 30678292  | T | <i>SCFD1</i>    | 0.081  | 1.92x10 <sup>-5</sup> |
| rs118082508 | 12 | 56925035  | T | <i>SDR9C7</i>   | 0.288  | 3.76x10 <sup>-5</sup> |
| rs111970477 | 3  | 47064091  | A | <i>SETD2</i>    | -0.262 | 6.96x10 <sup>-5</sup> |
| rs430979    | 4  | 2812971   | T | <i>SH3BP2</i>   | -0.085 | 2.63x10 <sup>-6</sup> |
| rs9995307   | 4  | 146488500 | A | <i>SLC10A7</i>  | 0.080  | 8.43x10 <sup>-5</sup> |
| rs118038177 | 11 | 121459793 | T | <i>SORL1</i>    | -0.216 | 4.79x10 <sup>-5</sup> |
| rs60318796  | 17 | 32991387  | T | <i>SPACA3</i>   | 0.109  | 4.87x10 <sup>-5</sup> |
| rs13387347  | 2  | 168898336 | T | <i>SPC25</i>    | 0.075  | 3.15x10 <sup>-5</sup> |
| rs12967284  | 18 | 12532099  | T | <i>SPIRE1</i>   | 0.079  | 1.74x10 <sup>-5</sup> |
| rs76805704  | 12 | 64138597  | A | <i>SRGAP1</i>   | 0.188  | 5.95x10 <sup>-6</sup> |
| rs79612353  | 20 | 59884601  | A | <i>SYCP2</i>    | 0.190  | 3.84x10 <sup>-5</sup> |
| rs112348322 | 4  | 118882809 | A | <i>SYNPO2</i>   | 0.276  | 2.60x10 <sup>-5</sup> |
| rs74654358  | 12 | 64488187  | A | <i>TBK1</i>     | 0.206  | 7.72x10 <sup>-7</sup> |
| rs11067262  | 12 | 114724621 | T | <i>TBX3-ASI</i> | 0.078  | 8.56x10 <sup>-5</sup> |
| rs79496463  | 8  | 132904843 | T | <i>TG</i>       | 0.194  | 7.17x10 <sup>-5</sup> |
| rs13410191  | 2  | 137643025 | A | <i>THSD7B</i>   | -0.069 | 9.98x10 <sup>-5</sup> |
| rs651001    | 6  | 11569169  | A | <i>TMEM170B</i> | -0.074 | 3.81x10 <sup>-5</sup> |
| rs115980385 | 7  | 141463227 | T | <i>TMEM178B</i> | 0.292  | 9.81x10 <sup>-5</sup> |
| rs10463311  | 5  | 151031274 | T | <i>TNIP1</i>    | -0.100 | 8.51x10 <sup>-7</sup> |
| rs4958888   | 5  | 151093281 | A | <i>TNIP1</i>    | 0.089  | 1.53x10 <sup>-5</sup> |
| rs78549703  | 19 | 17638733  | A | <i>UNC13A</i>   | 0.110  | 1.31x10 <sup>-8</sup> |
| rs8180839   | 7  | 5200339   | A | <i>WIPI2</i>    | 0.151  | 6.46x10 <sup>-5</sup> |
| rs138116283 | 4  | 4318540   | A | <i>ZBTB49</i>   | 0.337  | 7.77x10 <sup>-6</sup> |
| rs4974650   | 4  | 2309992   | A | <i>ZFYVE28</i>  | 0.090  | 1.63x10 <sup>-6</sup> |
| rs8101883   | 19 | 56681170  | A | <i>ZIM2-ASI</i> | 0.084  | 1.97x10 <sup>-5</sup> |
| rs6997565   | 8  | 2560505   | T | Intergenic      | -0.146 | 1.54x10 <sup>-6</sup> |
| rs7118388   | 11 | 34432600  | A | Intergenic      | -0.084 | 2.34x10 <sup>-6</sup> |
| rs144387708 | 12 | 119264395 | A | Intergenic      | 0.348  | 4.95x10 <sup>-6</sup> |
| rs116900480 | 12 | 58262322  | T | Intergenic      | 0.294  | 7.07x10 <sup>-6</sup> |
| rs12900374  | 15 | 82741261  | T | Intergenic      | 0.107  | 7.27x10 <sup>-6</sup> |
| rs10050775  | 5  | 38007940  | A | Intergenic      | -0.109 | 1.08x10 <sup>-5</sup> |
| rs117860708 | 11 | 1537217   | A | Intergenic      | 0.237  | 1.30x10 <sup>-5</sup> |
| rs116946806 | 7  | 131997812 | T | Intergenic      | 0.224  | 1.43x10 <sup>-5</sup> |
| rs4676496   | 3  | 39456514  | A | Intergenic      | 0.077  | 1.44x10 <sup>-5</sup> |
| rs71472777  | 11 | 24121389  | T | Intergenic      | 0.241  | 1.45x10 <sup>-5</sup> |
| rs112913348 | 5  | 108554187 | T | Intergenic      | -0.156 | 1.51x10 <sup>-5</sup> |

|             |    |           |   |            |        |                       |
|-------------|----|-----------|---|------------|--------|-----------------------|
| rs34384833  | 5  | 91942338  | A | Intergenic | 0.265  | 1.75x10 <sup>-5</sup> |
| rs12472309  | 2  | 7266695   | T | Intergenic | 0.229  | 2.45x10 <sup>-5</sup> |
| rs10488631  | 7  | 128954129 | T | Intergenic | -0.120 | 2.52x10 <sup>-5</sup> |
| rs7041171   | 9  | 111939350 | T | Intergenic | -0.094 | 2.71x10 <sup>-5</sup> |
| rs12138742  | 1  | 119591406 | T | Intergenic | -0.123 | 2.74x10 <sup>-5</sup> |
| rs62290425  | 4  | 4963737   | A | Intergenic | 0.126  | 2.93x10 <sup>-5</sup> |
| rs3098553   | 15 | 27631110  | T | Intergenic | 0.267  | 3.04x10 <sup>-5</sup> |
| rs79676202  | 12 | 49786775  | T | Intergenic | 0.204  | 3.08x10 <sup>-5</sup> |
| rs970258    | 2  | 5138399   | T | Intergenic | -0.100 | 3.11x10 <sup>-5</sup> |
| rs72716562  | 5  | 7957484   | A | Intergenic | -0.209 | 3.12x10 <sup>-5</sup> |
| rs141347161 | 7  | 42377714  | T | Intergenic | 0.149  | 3.30x10 <sup>-5</sup> |
| rs10008582  | 4  | 146026232 | A | Intergenic | -0.106 | 3.53x10 <sup>-5</sup> |
| rs77058105  | 20 | 17070347  | T | Intergenic | -0.198 | 3.85x10 <sup>-5</sup> |
| rs144129573 | 12 | 114485139 | T | Intergenic | -0.209 | 4.61x10 <sup>-5</sup> |
| rs141730255 | 7  | 138253804 | A | Intergenic | -0.180 | 5.11x10 <sup>-5</sup> |
| rs79446108  | 7  | 137863942 | T | Intergenic | 0.186  | 5.33x10 <sup>-5</sup> |
| rs6020200   | 20 | 50017227  | A | Intergenic | -0.101 | 5.36x10 <sup>-5</sup> |
| rs6420358   | 13 | 84715333  | A | Intergenic | -0.080 | 6.14x10 <sup>-5</sup> |
| rs12220832  | 10 | 80806689  | T | Intergenic | 0.123  | 6.27x10 <sup>-5</sup> |
| rs117452182 | 13 | 27293529  | A | Intergenic | 0.284  | 6.31x10 <sup>-5</sup> |
| rs7602576   | 2  | 112942040 | T | Intergenic | -0.087 | 6.39x10 <sup>-5</sup> |
| rs11702120  | 21 | 23786163  | A | Intergenic | 0.202  | 6.40x10 <sup>-5</sup> |
| rs118071175 | 14 | 28515686  | T | Intergenic | 0.123  | 6.78x10 <sup>-5</sup> |
| rs7209200   | 17 | 5066645   | T | Intergenic | -0.075 | 6.82x10 <sup>-5</sup> |
| rs9567838   | 13 | 47359837  | T | Intergenic | 0.095  | 6.87x10 <sup>-5</sup> |
| rs112288580 | 11 | 98729819  | A | Intergenic | -0.290 | 7.00x10 <sup>-5</sup> |
| rs9819308   | 3  | 1691812   | A | Intergenic | -0.086 | 7.06x10 <sup>-5</sup> |
| rs6037557   | 20 | 405220    | T | Intergenic | -0.097 | 7.56x10 <sup>-5</sup> |
| rs9956309   | 18 | 38136697  | A | Intergenic | -0.091 | 8.42x10 <sup>-5</sup> |
| rs76323495  | 16 | 16859460  | A | Intergenic | -0.200 | 8.54x10 <sup>-5</sup> |
| rs16905848  | 11 | 20223160  | T | Intergenic | -0.097 | 8.72x10 <sup>-5</sup> |
| rs35851984  | 17 | 28239061  | A | Intergenic | -0.070 | 8.98x10 <sup>-5</sup> |
| rs76427181  | 6  | 86684739  | A | Intergenic | -0.224 | 9.38x10 <sup>-5</sup> |
| rs2176039   | 22 | 45189151  | A | Intergenic | 0.069  | 9.44x10 <sup>-5</sup> |
| rs1570281   | 6  | 146517546 | A | Intergenic | -0.077 | 9.66x10 <sup>-5</sup> |
| rs72838433  | 2  | 127913724 | A | Intergenic | 0.073  | 9.87x10 <sup>-5</sup> |
| rs193044924 | 17 | 15767328  | A | Intergenic | -0.077 | 9.89x10 <sup>-5</sup> |
| rs73152707  | 3  | 86619077  | T | Intergenic | 0.170  | 9.94x10 <sup>-5</sup> |
| rs1146342   | 1  | 118440554 | T | Intergenic | 0.269  | 9.98x10 <sup>-5</sup> |

**Table S2. The genetic risk score influenced the age of symptom onset among *C9orf72* carriers, related to Figure 3.**

The *bottom 3%* group is composed of individuals whose Z-score is in the bottom 3% of the genetic risk score distribution among *C9orf72* carriers and non-carriers, respectively. The *medium* group is comprised of individuals whose z-score is between 20-80% of the genetic risk score distribution. The *top 3%* group is comprised of individuals whose z-score is between 97-100% of the genetic risk score distribution.

|                     | Age at onset mean | Age at onset standard deviation | Z-score mean | Z-score standard deviation | Count |
|---------------------|-------------------|---------------------------------|--------------|----------------------------|-------|
| <b>Carriers</b>     |                   |                                 |              |                            |       |
| Bottom 3%           | 58.11             | 10.23                           | -2.21        | 0.4                        | 27    |
| Medium              | 57.51             | 9.25                            | 0.04         | 0.49                       | 488   |
| Top 3%              | 55.12             | 9.92                            | 2.35         | 0.36                       | 32    |
| <b>Non-Carriers</b> |                   |                                 |              |                            |       |
| Bottom 3%           | 60.25             | 12.18                           | -2.2         | 0.35                       | 213   |
| Medium              | 60.07             | 12.48                           | -0.03        | 0.47                       | 4288  |
| Top 3%              | 60.07             | 12.63                           | 2.21         | 0.4                        | 280   |

**Table S3. The leave-one-out analysis stratified the 161 SNPs of the ALS genetic risk into ten deciles, related to Figure 4.**

Decile ten contains the variants with a more significant contribution to age at onset. LOO, leave-one-out (indicating the removed SNP); Chr, chromosome; Pos (hg38), genomic position, GRCh38 assembly; SE, standard error.

| LOO         | Chr | Pos (hg38) | Gene name              | Beta   | SE    | P-value | Decile | Rank |
|-------------|-----|------------|------------------------|--------|-------|---------|--------|------|
| rs9901522   | 17  | 14770617   | <i>ENSG00000205325</i> | -0.678 | 0.336 | 0.044   | 10     | 1st  |
| rs118036547 | 15  | 27863948   | <i>OCA2</i>            | -0.705 | 0.337 | 0.037   | 10     | 2nd  |
| rs2294928   | 22  | 43986973   | <i>SAMM50</i>          | -0.708 | 0.336 | 0.036   | 10     | 3rd  |
| rs61954176  | 13  | 40198035   | <i>LINC00598</i>       | -0.711 | 0.337 | 0.035   | 10     | 4th  |
| rs62073477  | 17  | 78448064   | <i>DNAH17</i>          | -0.715 | 0.337 | 0.034   | 10     | 6th  |
| rs79502718  | 18  | 50919413   | <i>ME2</i>             | -0.715 | 0.336 | 0.034   | 10     | 5th  |
| rs113247976 | 12  | 57581917   | <i>KIF5A</i>           | -0.716 | 0.336 | 0.034   | 10     | 7th  |
| rs118082508 | 12  | 56925035   | <i>SDR9C7</i>          | -0.716 | 0.337 | 0.034   | 10     | 8th  |
| rs1146342   | 1   | 118440554  | Intergenic             | -0.718 | 0.336 | 0.033   | 10     | 9th  |
| rs117219925 | 12  | 23142104   | <i>ENSG00000256995</i> | -0.72  | 0.337 | 0.033   | 10     | 10th |
| rs116900480 | 12  | 58262322   | Intergenic             | -0.721 | 0.336 | 0.032   | 10     | 11th |
| rs10876069  | 12  | 50599395   | <i>DIP2B</i>           | -0.725 | 0.336 | 0.031   | 10     | 12th |
| rs6420358   | 13  | 84715333   | Intergenic             | -0.727 | 0.336 | 0.031   | 10     | 13th |
| rs7118388   | 11  | 34432600   | Intergenic             | -0.728 | 0.336 | 0.031   | 10     | 14th |
| rs9355960   | 6   | 161901879  | <i>PRKN</i>            | -0.728 | 0.336 | 0.031   | 10     | 15th |
| rs10938692  | 4   | 8116834    | <i>ABLIM2</i>          | -0.73  | 0.336 | 0.03    | 10     | 16th |
| rs10488631  | 7   | 128954129  | Intergenic             | -0.731 | 0.337 | 0.03    | 9      | 17th |
| rs34384833  | 5   | 91942338   | Intergenic             | -0.732 | 0.336 | 0.03    | 9      | 18th |
| rs116876275 | 13  | 65954214   | <i>ENSG00000286395</i> | -0.733 | 0.336 | 0.03    | 9      | 19th |
| rs12972250  | 19  | 329746     | <i>MIER2</i>           | -0.738 | 0.336 | 0.029   | 9      | 20th |
| rs11608027  | 11  | 34492865   | <i>ELF5</i>            | -0.739 | 0.336 | 0.028   | 9      | 22nd |
| rs17171046  | 7   | 37438260   | <i>ELMO1</i>           | -0.739 | 0.336 | 0.028   | 9      | 24th |
| rs62290425  | 4   | 4963737    | Intergenic             | -0.739 | 0.336 | 0.028   | 9      | 21st |
| rs6683585   | 1   | 240967882  | <i>RGS7</i>            | -0.739 | 0.337 | 0.028   | 9      | 23rd |
| rs6737916   | 2   | 32372917   | <i>BIRC6</i>           | -0.739 | 0.336 | 0.028   | 9      | 25th |
| rs10008582  | 4   | 146026232  | Intergenic             | -0.74  | 0.336 | 0.028   | 9      | 26th |
| rs7041171   | 9   | 111939350  | Intergenic             | -0.74  | 0.336 | 0.028   | 9      | 27th |
| rs9995307   | 4   | 146488500  | <i>SLC10A7</i>         | -0.74  | 0.336 | 0.028   | 9      | 28th |
| rs4958888   | 5   | 151093281  | <i>TNIP1</i>           | -0.741 | 0.337 | 0.028   | 9      | 29th |
| rs12991146  | 2   | 59884087   | <i>ENSG00000271955</i> | -0.742 | 0.337 | 0.028   | 9      | 32nd |
| rs4945276   | 11  | 78453938   | <i>NARS2</i>           | -0.742 | 0.336 | 0.028   | 9      | 31st |
| rs56024498  | 16  | 76893238   | <i>ENSG00000259995</i> | -0.742 | 0.336 | 0.028   | 9      | 30th |
| rs144476584 | 9   | 23029711   | <i>ENSG00000284418</i> | -0.743 | 0.336 | 0.027   | 8      | 33rd |
| rs642811    | 11  | 78053929   | <i>NDUF2-KCTD14</i>    | -0.743 | 0.336 | 0.027   | 8      | 34th |
| rs35346557  | 3   | 190120229  | <i>P3H2</i>            | -0.744 | 0.336 | 0.027   | 8      | 35th |
| rs71472777  | 11  | 24121389   | Intergenic             | -0.744 | 0.336 | 0.027   | 8      | 36th |

|             |    |           |                        |        |       |       |   |      |
|-------------|----|-----------|------------------------|--------|-------|-------|---|------|
| rs118072482 | 8  | 138017250 | <i>ENSG00000253288</i> | -0.745 | 0.336 | 0.027 | 8 | 37th |
| rs13410191  | 2  | 137643025 | <i>THSD7B</i>          | -0.745 | 0.336 | 0.027 | 8 | 38th |
| rs35714695  | 17 | 28392769  | <i>SARM1</i>           | -0.745 | 0.336 | 0.027 | 8 | 39th |
| rs11718653  | 3  | 122759011 | <i>HSPBAP1</i>         | -0.746 | 0.336 | 0.027 | 8 | 40th |
| rs2240601   | 17 | 57673751  | <i>MSI2</i>            | -0.746 | 0.336 | 0.027 | 8 | 41st |
| rs1570281   | 6  | 146517546 | Intergenic             | -0.747 | 0.336 | 0.027 | 8 | 43rd |
| rs74654358  | 12 | 64488187  | <i>TBK1</i>            | -0.747 | 0.337 | 0.027 | 8 | 42nd |
| rs2253050   | 16 | 74040378  | <i>PSMD7-DT</i>        | -0.748 | 0.336 | 0.027 | 8 | 46th |
| rs34432311  | 2  | 177346958 | <i>NFE2L2</i>          | -0.748 | 0.336 | 0.026 | 8 | 47th |
| rs76805704  | 12 | 64138597  | <i>SRGAP1</i>          | -0.748 | 0.337 | 0.027 | 8 | 45th |
| rs77058105  | 20 | 17070347  | Intergenic             | -0.748 | 0.336 | 0.027 | 8 | 44th |
| rs10463311  | 5  | 151031274 | <i>TNIP1</i>           | -0.749 | 0.336 | 0.026 | 8 | 48th |
| rs16905848  | 11 | 20223160  | Intergenic             | -0.749 | 0.336 | 0.026 | 7 | 50th |
| rs2477866   | 1  | 233152025 | <i>PCNX2</i>           | -0.749 | 0.337 | 0.026 | 7 | 49th |
| rs12138742  | 1  | 119591406 | Intergenic             | -0.75  | 0.336 | 0.026 | 7 | 52nd |
| rs138116283 | 4  | 4318540   | <i>ZBTB49</i>          | -0.75  | 0.336 | 0.026 | 7 | 53rd |
| rs6020200   | 20 | 50017227  | Intergenic             | -0.75  | 0.336 | 0.026 | 7 | 51st |
| rs11695294  | 2  | 176608890 | <i>LINC01117</i>       | -0.751 | 0.336 | 0.026 | 7 | 56th |
| rs60318796  | 17 | 32991387  | <i>SPACA3</i>          | -0.751 | 0.336 | 0.026 | 7 | 54th |
| rs73103977  | 12 | 53513226  | <i>ATF7</i>            | -0.751 | 0.336 | 0.026 | 7 | 55th |
| rs10430614  | 10 | 131935136 | <i>PPP2R2D</i>         | -0.752 | 0.336 | 0.026 | 7 | 58th |
| rs117452182 | 13 | 27293529  | Intergenic             | -0.752 | 0.336 | 0.026 | 7 | 57th |
| rs9956309   | 18 | 38136697  | Intergenic             | -0.752 | 0.336 | 0.026 | 7 | 59th |
| rs1159918   | 4  | 99321852  | <i>ADH1B</i>           | -0.753 | 0.336 | 0.025 | 7 | 60th |
| rs143747467 | 16 | 11367549  | <i>RMI2</i>            | -0.753 | 0.337 | 0.026 | 7 | 61st |
| rs2893656   | 7  | 106534655 | <i>ENSG00000243797</i> | -0.754 | 0.336 | 0.025 | 7 | 62nd |
| rs2176039   | 22 | 45189151  | Intergenic             | -0.755 | 0.336 | 0.025 | 6 | 65th |
| rs28660489  | 12 | 64560784  | <i>RASSF3</i>          | -0.755 | 0.336 | 0.025 | 7 | 63rd |
| rs7602576   | 2  | 112942040 | Intergenic             | -0.755 | 0.336 | 0.025 | 7 | 64th |
| rs118038177 | 11 | 121459793 | <i>SORL1</i>           | -0.756 | 0.336 | 0.025 | 6 | 68th |
| rs6947666   | 7  | 137708989 | <i>DGKI</i>            | -0.756 | 0.336 | 0.025 | 6 | 66th |
| rs9567838   | 13 | 47359837  | Intergenic             | -0.756 | 0.336 | 0.025 | 6 | 67th |
| rs112288580 | 11 | 98729819  | Intergenic             | -0.757 | 0.336 | 0.025 | 6 | 70th |
| rs115980385 | 7  | 141463227 | <i>TMEM178B</i>        | -0.757 | 0.336 | 0.025 | 6 | 69th |
| rs6997565   | 8  | 2560505   | Intergenic             | -0.757 | 0.337 | 0.025 | 6 | 71st |
| rs72973932  | 11 | 74400615  | <i>ENSG00000254631</i> | -0.758 | 0.337 | 0.025 | 6 | 72nd |
| rs11171999  | 12 | 56846925  | <i>ENSG00000258679</i> | -0.759 | 0.336 | 0.024 | 6 | 73rd |
| rs141730255 | 7  | 138253804 | Intergenic             | -0.761 | 0.336 | 0.024 | 6 | 74th |
| rs111704832 | 15 | 93374070  | <i>ENSG00000257060</i> | -0.762 | 0.336 | 0.024 | 6 | 77th |
| rs141347161 | 7  | 42377714  | Intergenic             | -0.762 | 0.336 | 0.024 | 6 | 76th |
| rs538622    | 5  | 172920676 | <i>ERGIC1</i>          | -0.762 | 0.336 | 0.024 | 6 | 75th |
| rs72792226  | 10 | 48204534  | <i>FRMPD2</i>          | -0.762 | 0.336 | 0.024 | 6 | 78th |
| rs10492593  | 13 | 66919985  | <i>PCDH9</i>           | -0.763 | 0.336 | 0.024 | 5 | 83rd |



|             |    |           |                        |        |       |       |   |       |
|-------------|----|-----------|------------------------|--------|-------|-------|---|-------|
| rs12900374  | 15 | 82741261  | Intergenic             | -0.763 | 0.336 | 0.024 | 6 | 80th  |
| rs17326496  | 5  | 113340882 | <i>MCC</i>             | -0.763 | 0.336 | 0.023 | 5 | 81st  |
| rs28407220  | 2  | 33816106  | <i>LINC01320</i>       | -0.763 | 0.336 | 0.023 | 5 | 86th  |
| rs35059420  | 5  | 169995487 | <i>DOCK2</i>           | -0.763 | 0.336 | 0.023 | 5 | 84th  |
| rs36037136  | 1  | 164710739 | <i>PBX1</i>            | -0.763 | 0.336 | 0.023 | 5 | 85th  |
| rs4273590   | 5  | 159335610 | <i>ENSG00000249738</i> | -0.763 | 0.336 | 0.024 | 5 | 82nd  |
| rs9653747   | 21 | 18669100  | <i>MIR548XHG</i>       | -0.763 | 0.336 | 0.024 | 6 | 79th  |
| rs12967284  | 18 | 12532099  | <i>SPIRE1</i>          | -0.764 | 0.336 | 0.023 | 5 | 89th  |
| rs144049425 | 2  | 162505368 | <i>KCNH7</i>           | -0.764 | 0.336 | 0.023 | 5 | 87th  |
| rs68072647  | 17 | 9224590   | <i>NTN1</i>            | -0.764 | 0.336 | 0.023 | 5 | 88th  |
| rs112820958 | 5  | 79465868  | <i>HOMER1</i>          | -0.765 | 0.336 | 0.023 | 5 | 91st  |
| rs12079484  | 1  | 181048307 | <i>MRI</i>             | -0.765 | 0.336 | 0.023 | 5 | 90th  |
| rs144129573 | 12 | 114485139 | Intergenic             | -0.765 | 0.336 | 0.023 | 5 | 93rd  |
| rs35851984  | 17 | 28239061  | Intergenic             | -0.765 | 0.336 | 0.023 | 5 | 92nd  |
| rs11652752  | 17 | 67379776  | <i>PITPNC1</i>         | -0.766 | 0.336 | 0.023 | 5 | 94th  |
| rs12220832  | 10 | 80806689  | Intergenic             | -0.766 | 0.336 | 0.023 | 4 | 99th  |
| rs150278778 | 1  | 209379025 | <i>LINC01698</i>       | -0.766 | 0.336 | 0.023 | 4 | 100th |
| rs5766195   | 22 | 44921429  | <i>PHF21B</i>          | -0.766 | 0.336 | 0.023 | 5 | 95th  |
| rs77238283  | 17 | 11797907  | <i>DNAH9</i>           | -0.766 | 0.336 | 0.023 | 4 | 97th  |
| rs7764458   | 6  | 83116819  | <i>DOPIA</i>           | -0.766 | 0.336 | 0.023 | 4 | 101st |
| rs79612353  | 20 | 59884601  | <i>SYCP2</i>           | -0.766 | 0.336 | 0.023 | 5 | 96th  |
| rs8101883   | 19 | 56681170  | <i>ZIM2-AS1</i>        | -0.766 | 0.336 | 0.023 | 4 | 98th  |
| rs12229321  | 12 | 64518074  | <i>RASSF3</i>          | -0.767 | 0.336 | 0.023 | 4 | 103rd |
| rs1442671   | 18 | 69528820  | <i>DOK6</i>            | -0.767 | 0.336 | 0.023 | 4 | 102nd |
| rs72838433  | 2  | 127913724 | Intergenic             | -0.768 | 0.336 | 0.023 | 4 | 104th |
| rs430979    | 4  | 2812971   | <i>SH3BP2</i>          | -0.769 | 0.336 | 0.022 | 4 | 106th |
| rs6037557   | 20 | 405220    | Intergenic             | -0.769 | 0.336 | 0.022 | 4 | 107th |
| rs79446108  | 7  | 137863942 | Intergenic             | -0.769 | 0.336 | 0.022 | 4 | 105th |
| rs116488199 | 10 | 1675116   | <i>ADARB2</i>          | -0.77  | 0.336 | 0.022 | 4 | 108th |
| rs13387347  | 2  | 168898336 | <i>SPC25</i>           | -0.77  | 0.336 | 0.022 | 4 | 111th |
| rs2985994   | 13 | 45539849  | <i>ERICH6B</i>         | -0.77  | 0.336 | 0.022 | 4 | 112th |
| rs76427181  | 6  | 86684739  | Intergenic             | -0.77  | 0.336 | 0.022 | 4 | 109th |
| rs78549703  | 19 | 17638733  | <i>UNC13A</i>          | -0.77  | 0.336 | 0.022 | 4 | 110th |
| rs193044924 | 17 | 15767328  | Intergenic             | -0.771 | 0.336 | 0.022 | 3 | 114th |
| rs6603044   | 15 | 83015059  | <i>ENSG00000259805</i> | -0.771 | 0.336 | 0.022 | 3 | 113th |
| rs10139154  | 14 | 30678292  | <i>SCFD1</i>           | -0.772 | 0.336 | 0.022 | 3 | 116th |
| rs150949995 | 5  | 150518937 | <i>NDST1</i>           | -0.772 | 0.336 | 0.022 | 3 | 117th |
| rs8053191   | 16 | 81117558  | <i>PKD1L2</i>          | -0.772 | 0.337 | 0.022 | 3 | 115th |
| rs72733862  | 5  | 8446181   | <i>LINC02226</i>       | -0.773 | 0.336 | 0.022 | 3 | 118th |
| rs76323495  | 16 | 16859460  | Intergenic             | -0.773 | 0.336 | 0.022 | 3 | 119th |
| rs4974650   | 4  | 2309992   | <i>ZFYVE28</i>         | -0.774 | 0.336 | 0.022 | 3 | 120th |
| rs79676202  | 12 | 49786775  | Intergenic             | -0.774 | 0.336 | 0.022 | 3 | 121st |
| rs16865645  | 2  | 177696567 | <i>PDE11A</i>          | -0.775 | 0.336 | 0.021 | 3 | 122nd |

|             |    |           |                        |        |       |       |   |       |
|-------------|----|-----------|------------------------|--------|-------|-------|---|-------|
| rs116946806 | 7  | 131997812 | Intergenic             | -0.776 | 0.336 | 0.021 | 3 | 123rd |
| rs320019    | 1  | 48610454  | <i>AGBL4</i>           | -0.776 | 0.336 | 0.021 | 3 | 124th |
| rs11185388  | 1  | 104198732 | <i>ENSG00000215869</i> | -0.777 | 0.336 | 0.021 | 3 | 125th |
| rs3109207   | 4  | 168675360 | <i>PALLD</i>           | -0.777 | 0.336 | 0.021 | 3 | 126th |
| rs11065961  | 12 | 111585263 | <i>ATXN2</i>           | -0.778 | 0.336 | 0.021 | 3 | 127th |
| rs111970477 | 3  | 47064091  | <i>SETD2</i>           | -0.779 | 0.336 | 0.021 | 3 | 128th |
| rs115348904 | 4  | 158390602 | <i>RXFP1</i>           | -0.779 | 0.337 | 0.021 | 2 | 129th |
| rs112913348 | 5  | 108554187 | Intergenic             | -0.78  | 0.336 | 0.021 | 2 | 131st |
| rs72716562  | 5  | 7957484   | Intergenic             | -0.78  | 0.336 | 0.021 | 2 | 130th |
| rs8180839   | 7  | 5200339   | <i>WIPI2</i>           | -0.782 | 0.336 | 0.02  | 2 | 132nd |
| rs12472309  | 2  | 7266695   | Intergenic             | -0.783 | 0.336 | 0.02  | 2 | 134th |
| rs2271689   | 10 | 17046273  | <i>CUBN</i>            | -0.783 | 0.336 | 0.02  | 2 | 133rd |
| rs12369156  | 12 | 120729872 | <i>ACADS</i>           | -0.785 | 0.336 | 0.02  | 2 | 135th |
| rs75087725  | 21 | 44333234  | <i>CFAP410</i>         | -0.785 | 0.336 | 0.02  | 2 | 136th |
| rs10067826  | 5  | 10282407  | <i>CMBL</i>            | -0.786 | 0.336 | 0.02  | 2 | 138th |
| rs35318094  | 5  | 180245984 | <i>MAPK9</i>           | -0.786 | 0.336 | 0.02  | 2 | 139th |
| rs73152707  | 3  | 86619077  | Intergenic             | -0.786 | 0.336 | 0.02  | 2 | 137th |
| rs970258    | 2  | 5138399   | Intergenic             | -0.786 | 0.336 | 0.02  | 2 | 140th |
| rs117860708 | 11 | 1537217   | Intergenic             | -0.788 | 0.336 | 0.019 | 2 | 141st |
| rs4676496   | 3  | 39456514  | Intergenic             | -0.788 | 0.336 | 0.019 | 2 | 142nd |
| rs11067262  | 12 | 114724621 | <i>TBX3-AS1</i>        | -0.789 | 0.336 | 0.019 | 2 | 144th |
| rs3098553   | 15 | 27631110  | Intergenic             | -0.789 | 0.336 | 0.019 | 2 | 143rd |
| rs9819308   | 3  | 1691812   | Intergenic             | -0.79  | 0.336 | 0.019 | 1 | 145th |
| rs10050775  | 5  | 38007940  | Intergenic             | -0.791 | 0.336 | 0.019 | 1 | 146th |
| rs10443173  | 1  | 86068071  | <i>COL24A1</i>         | -0.796 | 0.336 | 0.018 | 1 | 148th |
| rs144387708 | 12 | 119264395 | Intergenic             | -0.796 | 0.336 | 0.018 | 1 | 150th |
| rs3798105   | 5  | 133194937 | <i>ENSG00000248245</i> | -0.796 | 0.336 | 0.018 | 1 | 149th |
| rs9903355   | 17 | 36580791  | <i>GGNBP2</i>          | -0.796 | 0.336 | 0.018 | 1 | 147th |
| rs7209200   | 17 | 5066645   | Intergenic             | -0.797 | 0.336 | 0.018 | 1 | 151st |
| rs651001    | 6  | 11569169  | <i>TMEM170B</i>        | -0.798 | 0.336 | 0.018 | 1 | 153rd |
| rs79496463  | 8  | 132904843 | <i>TG</i>              | -0.798 | 0.336 | 0.018 | 1 | 152nd |
| rs9813285   | 3  | 29329178  | <i>RBMS3</i>           | -0.804 | 0.336 | 0.017 | 1 | 154th |
| rs118071175 | 14 | 28515686  | Intergenic             | -0.805 | 0.336 | 0.017 | 1 | 155th |
| rs7930973   | 11 | 44159478  | <i>EXT2</i>            | -0.806 | 0.336 | 0.017 | 1 | 156th |
| rs11702120  | 21 | 23786163  | Intergenic             | -0.808 | 0.336 | 0.016 | 1 | 157th |
| rs7258235   | 19 | 2612120   | <i>GNG7</i>            | -0.811 | 0.336 | 0.016 | 1 | 158th |
| rs4292737   | 8  | 10401605  | <i>MSRA</i>            | -0.814 | 0.336 | 0.016 | 1 | 159th |
| rs112348322 | 4  | 118882809 | <i>SYNPO2</i>          | -0.833 | 0.336 | 0.013 | 1 | 160th |
| rs12886280  | 14 | 31829453  | <i>NUBPL</i>           | -0.834 | 0.336 | 0.013 | 1 | 161st |

**Table S4. Enrichment analysis identified pathways influencing the age of symptom onset among *C9orf72* carriers, related to Figure 4.**

Enrichment analysis for decile ten was based on the variants that make up decile ten plus the *C9orf72* gene. g:Profiler maps intronic variants to their corresponding gene. Decile refers to the decile that yielded the pathways on enrichment analysis. No significant pathways were identified for deciles 1–4 and 9. GO:MF, Gene Ontology, molecular function; GO:BP, Gene Ontology, biological process; KEGG, Kyoto Encyclopedia of Genes and Genomes.

| Source | Term name                                                                             | Category                    | Term ID    | Adjusted p-value | Decile |
|--------|---------------------------------------------------------------------------------------|-----------------------------|------------|------------------|--------|
| GO:MF  | ATP-dependent microtubule motor activity                                              | Transport                   | GO:1990939 | 0.020            | 10     |
| GO:MF  | Motor activity                                                                        | Transport                   | GO:0003774 | 0.020            | 10     |
| GO:MF  | Microtubule motor activity                                                            | Transport                   | GO:0003777 | 0.020            | 10     |
| GO:BP  | Vacuolar transport                                                                    | Transport                   | GO:0007034 | 0.043            | 10     |
| GO:BP  | Cytosolic transport                                                                   | Transport                   | GO:0016482 | 0.045            | 10     |
| GO:MF  | Tubulin binding                                                                       | Transport                   | GO:0015631 | 0.020            | 10     |
| GO:BP  | Developmental growth involved in morphogenesis                                        | Transport                   | GO:0060560 | 0.034            | 10     |
| GO:BP  | Developmental cell growth                                                             | Transport                   | GO:0048588 | 0.034            | 10     |
| GO:BP  | Cell growth                                                                           | Transport                   | GO:0016049 | 0.040            | 10     |
| GO:BP  | Synaptic vesicle transport                                                            | Axonal transport            | GO:0048489 | 0.034            | 10     |
| GO:BP  | Synaptic vesicle localization                                                         | Axonal transport            | GO:0097479 | 0.035            | 10     |
| GO:BP  | Axon extension                                                                        | Axonal transport            | GO:0048675 | 0.040            | 10     |
| GO:BP  | Neuron projection extension                                                           | Axonal transport            | GO:1990138 | 0.028            | 10     |
| GO:BP  | Axonogenesis                                                                          | Axonal transport            | GO:0007409 | 0.040            | 10     |
| GO:BP  | Lysosomal transport                                                                   | Autophagy                   | GO:0007041 | 0.040            | 10     |
| GO:BP  | Positive regulation of autophagy                                                      | Autophagy                   | GO:0010508 | 0.040            | 10     |
| GO:BP  | Establishment of protein localization to mitochondrion                                | Mitochondria                | GO:0072655 | 0.040            | 10     |
| GO:BP  | Protein targeting to mitochondrion                                                    | Mitochondria                | GO:0006626 | 0.040            | 10     |
| GO:BP  | Protein localization to mitochondrion                                                 | Mitochondria                | GO:0070585 | 0.041            | 10     |
| KEGG   | Amyotrophic lateral sclerosis                                                         | Neurodegeneration           | KEGG:05014 | 0.001            | 10     |
| KEGG   | Pathways of neurodegeneration - multiple diseases                                     | Neurodegeneration           | KEGG:05022 | 0.002            | 10     |
| GO:MF  | Oxidoreductase activity, acting on the CH-OH group of donors, NAD or NADP as acceptor | Other                       | GO:0016616 | 0.020            | 10     |
| GO:MF  | Oxidoreductase activity, acting on CH-OH group of donors                              | Other                       | GO:0016614 | 0.021            | 10     |
| GO:BP  | Phenol-containing compound metabolic process                                          | Other                       | GO:0018958 | 0.040            | 10     |
| GO:BP  | Regulation of innate immune response                                                  | Defense response            | GO:0045088 | 0.011            | 8      |
| GO:BP  | Positive regulation of response to biotic stimulus                                    | Response to biotic stimulus | GO:0002833 | 0.017            | 8      |
| GO:BP  | Innate immune response-activating signaling pathway                                   | Defense response            | GO:0002758 | 0.017            | 8      |
| GO:BP  | Positive regulation of innate immune response                                         | Defense response            | GO:0045089 | 0.017            | 8      |
| GO:BP  | Pattern recognition receptor signaling pathway                                        | Defense response            | GO:0002221 | 0.017            | 8      |

|       |                                                           |                                        |            |       |   |
|-------|-----------------------------------------------------------|----------------------------------------|------------|-------|---|
| GO:BP | Activation of innate immune response                      | Defense response                       | GO:0002218 | 0.017 | 8 |
| GO:BP | Toll-like receptor signaling pathway                      | Receptor signaling pathway             | GO:0002224 | 0.017 | 8 |
| GO:BP | Immune response-activating signaling pathway              | Signal transduction                    | GO:0002757 | 0.023 | 8 |
| GO:BP | Positive regulation of defense response                   | Defense response                       | GO:0031349 | 0.023 | 8 |
| GO:BP | Immune response-regulating signaling pathway              | Signal transduction                    | GO:0002764 | 0.025 | 8 |
| GO:MF | 2-oxoglutarate-dependent dioxygenase activity             | Oxidoreductase activity                | GO:0016706 | 0.031 | 8 |
| GO:MF | Dioxygenase activity                                      | Oxidoreductase activity                | GO:0051213 | 0.037 | 8 |
| GO:BP | Stem cell differentiation                                 | Cellular developmental process         | GO:0048863 | 0.049 | 8 |
| GO:MF | Transcription coactivator binding                         | Transcription factor binding           | GO:0001223 | 0.006 | 7 |
| GO:MF | Transcription coregulator binding                         | Transcription factor binding           | GO:0001221 | 0.018 | 7 |
| GO:BP | Neutral lipid metabolic process                           | Cellular lipid metabolic process       | GO:0006638 | 0.016 | 6 |
| GO:BP | Acylglycerol metabolic process                            | Cellular lipid metabolic process       | GO:0006639 | 0.016 | 6 |
| GO:BP | Endoplasmic reticulum to Golgi vesicle-mediated transport | Intracellular transport                | GO:0006888 | 0.016 | 6 |
| GO:MF | Small GTPase binding                                      | Enzyme binding                         | GO:0031267 | 0.019 | 6 |
| GO:MF | GTPase binding                                            | Enzyme binding                         | GO:0051020 | 0.019 | 6 |
| GO:MF | Molecular function inhibitor activity                     | Molecular function regulatory activity | GO:0140678 | 0.019 | 6 |
| GO:MF | Enzyme inhibitor activity                                 | Enzyme regulator activity              | GO:0004857 | 0.019 | 6 |
| GO:BP | Golgi vesicle transport                                   | Vesicle-mediated transport             | GO:0048193 | 0.026 | 6 |
| GO:BP | Glycerolipid metabolic process                            | Cellular lipid metabolic process       | GO:0046486 | 0.030 | 6 |
| GO:MF | T cell receptor binding                                   | Signaling receptor binding             | GO:0042608 | 0.002 | 5 |

**Table S5. The list of genes used in the gene-gene similarity network *GREP* analysis, related to Figure 5.**

Seed genes refer to the genetically identified genes in decile ten.

| <b>Rank</b> | <b>Gene</b>      |
|-------------|------------------|
| Seed gene   | <i>ABLIM2</i>    |
| Seed gene   | <i>C9orf72</i>   |
| Seed gene   | <i>DIP2B</i>     |
| Seed gene   | <i>DNAH17</i>    |
| Seed gene   | <i>KIF5A</i>     |
| Seed gene   | <i>LINC00598</i> |
| Seed gene   | <i>ME2</i>       |
| Seed gene   | <i>OCA2</i>      |
| Seed gene   | <i>PRKN</i>      |
| Seed gene   | <i>SAMM50</i>    |
| Seed gene   | <i>SDR9C7</i>    |
| 1           | <i>RIMS3</i>     |
| 2           | <i>CAMKV</i>     |
| 3           | <i>CLASP2</i>    |
| 4           | <i>TUBB4A</i>    |
| 5           | <i>KCNQ2</i>     |
| 6           | <i>BSN</i>       |
| 7           | <i>KCNC1</i>     |
| 8           | <i>MAPK4</i>     |
| 9           | <i>SNCB</i>      |
| 10          | <i>CLVS2</i>     |
| 11          | <i>CNTN2</i>     |
| 12          | <i>SEPTIN3</i>   |
| 13          | <i>NCAN</i>      |
| 14          | <i>KIF1A</i>     |
| 15          | <i>LGI3</i>      |
| 16          | <i>CDH22</i>     |
| 17          | <i>CDHR1</i>     |
| 18          | <i>ADCYAP1R1</i> |
| 19          | <i>OTUD7A</i>    |
| 20          | <i>KIF1B</i>     |
| 21          | <i>SLC8A2</i>    |
| 22          | <i>TMEM151B</i>  |
| 23          | <i>TRIM9</i>     |
| 24          | <i>PHF24</i>     |
| 25          | <i>VSTM2B</i>    |
| 26          | <i>CACNA1B</i>   |
| 27          | <i>DOCK3</i>     |

|    |                |
|----|----------------|
| 28 | <i>NDRG4</i>   |
| 29 | <i>ATP1A3</i>  |
| 30 | <i>GPM6B</i>   |
| 31 | <i>CRHR1</i>   |
| 32 | <i>RBFOX1</i>  |
| 33 | <i>TPPP</i>    |
| 34 | <i>GRIA2</i>   |
| 35 | <i>NEFL</i>    |
| 36 | <i>SLC35F1</i> |
| 37 | <i>SNAP91</i>  |
| 38 | <i>KCNJ9</i>   |
| 39 | <i>HMP19</i>   |
| 40 | <i>ACTL6B</i>  |
| 41 | <i>CARMIL3</i> |
| 42 | <i>PLP1</i>    |
| 43 | <i>SYP</i>     |
| 44 | <i>CELSR2</i>  |
| 45 | <i>SULT4A1</i> |
| 46 | <i>NEFM</i>    |
| 47 | <i>RIMBP2</i>  |
| 48 | <i>CPLX2</i>   |
| 49 | <i>ASTN1</i>   |
| 50 | <i>CNTN1</i>   |
| 51 | <i>SHISA7</i>  |
| 52 | <i>STMN4</i>   |
| 53 | <i>SYN2</i>    |
| 54 | <i>GNAL</i>    |
| 55 | <i>DLG2</i>    |
| 56 | <i>KCNA2</i>   |
| 57 | <i>ARHGEF4</i> |
| 58 | <i>KIF5C</i>   |
| 59 | <i>IGSF11</i>  |
| 60 | <i>NSG1</i>    |
| 61 | <i>CELF3</i>   |
| 62 | <i>ZDHHC22</i> |
| 63 | <i>HRH3</i>    |
| 64 | <i>GDAP1L1</i> |
| 65 | <i>SCRT1</i>   |
| 66 | <i>INA</i>     |
| 67 | <i>NRXN1</i>   |
| 68 | <i>WNK2</i>    |
| 69 | <i>PTPN5</i>   |
| 70 | <i>MMD2</i>    |

|     |                 |
|-----|-----------------|
| 71  | <i>HPCAL4</i>   |
| 72  | <i>CHRNA2</i>   |
| 73  | <i>JPH3</i>     |
| 74  | <i>ATP2B3</i>   |
| 75  | <i>MAPK8IP2</i> |
| 76  | <i>HAPLN2</i>   |
| 77  | <i>MYT1</i>     |
| 78  | <i>PAFAH1B1</i> |
| 79  | <i>CDK5R1</i>   |
| 80  | <i>NOL4</i>     |
| 81  | <i>SYNPR</i>    |
| 82  | <i>ZNF536</i>   |
| 83  | <i>GALNT8</i>   |
| 84  | <i>CTNNA2</i>   |
| 85  | <i>ST8SIA3</i>  |
| 86  | <i>ABCG4</i>    |
| 87  | <i>LINGO1</i>   |
| 88  | <i>ADAM22</i>   |
| 89  | <i>AMER2</i>    |
| 90  | <i>PAK5</i>     |
| 91  | <i>PPFIA3</i>   |
| 92  | <i>SH3GL2</i>   |
| 93  | <i>PREPL</i>    |
| 94  | <i>ELMOD1</i>   |
| 95  | <i>ATP2B2</i>   |
| 96  | <i>LRR4B</i>    |
| 97  | <i>SORCS1</i>   |
| 98  | <i>DUSP26</i>   |
| 99  | <i>JPH4</i>     |
| 100 | <i>MAST1</i>    |
| 101 | <i>BRSK2</i>    |
| 102 | <i>CA11</i>     |
| 103 | <i>ELAVL3</i>   |
| 104 | <i>GNG3</i>     |
| 105 | <i>STXBPL</i>   |
| 106 | <i>PTPRZ1</i>   |
| 107 | <i>MAPT</i>     |
| 108 | <i>ZCCHC12</i>  |
| 109 | <i>RIMS4</i>    |
| 110 | <i>SYT4</i>     |
| 111 | <i>TMEM179</i>  |
| 112 | <i>CLASP1</i>   |
| 113 | <i>ELAVL4</i>   |

|     |                 |
|-----|-----------------|
| 114 | <i>SOCS7</i>    |
| 115 | <i>ADGRB3</i>   |
| 116 | <i>RUNDC3A</i>  |
| 117 | <i>SCN3B</i>    |
| 118 | <i>PSD2</i>     |
| 119 | <i>EFR3B</i>    |
| 120 | <i>GARNL3</i>   |
| 121 | <i>GRID1</i>    |
| 122 | <i>ZDHHC11B</i> |
| 123 | <i>TMEM63C</i>  |
| 124 | <i>RAB3C</i>    |
| 125 | <i>CHD5</i>     |
| 126 | <i>ADGRL3</i>   |
| 127 | <i>DPYSL5</i>   |
| 128 | <i>GRIK3</i>    |
| 129 | <i>PHYHIPL</i>  |
| 130 | <i>CCDC177</i>  |
| 131 | <i>GRIA4</i>    |
| 132 | <i>FBXL16</i>   |
| 133 | <i>IGSF21</i>   |
| 134 | <i>SEZ6L</i>    |
| 135 | <i>TTBK1</i>    |
| 136 | <i>CNTRF</i>    |
| 137 | <i>NRXN2</i>    |
| 138 | <i>LANCL1</i>   |
| 139 | <i>OLFM3</i>    |
| 140 | <i>SCG3</i>     |
| 141 | <i>ABCC8</i>    |
| 142 | <i>UNC13A</i>   |
| 143 | <i>SH3GL3</i>   |
| 144 | <i>GRIK5</i>    |
| 145 | <i>NELL1</i>    |
| 146 | <i>ATP1B2</i>   |
| 147 | <i>SCN4B</i>    |
| 148 | <i>CADM2</i>    |
| 149 | <i>RIPPLY2</i>  |
| 150 | <i>B3GAT1</i>   |
| 151 | <i>IGSF9B</i>   |
| 152 | <i>ANK2</i>     |
| 153 | <i>CADM4</i>    |
| 154 | <i>UBE2QL1</i>  |
| 155 | <i>PCDH8</i>    |
| 156 | <i>SYN1</i>     |



|     |                  |
|-----|------------------|
| 157 | <i>ADGRA1</i>    |
| 158 | <i>ADAM11</i>    |
| 159 | <i>KCNB2</i>     |
| 160 | <i>SMIM10L2A</i> |
| 161 | <i>NXPH1</i>     |
| 162 | <i>CHRNA4</i>    |
| 163 | <i>NAPB</i>      |
| 164 | <i>GAP43</i>     |
| 165 | <i>MAP3K9</i>    |
| 166 | <i>PGBD5</i>     |
| 167 | <i>LRRTM3</i>    |
| 168 | <i>PIP4K2B</i>   |
| 169 | <i>RAB3A</i>     |
| 170 | <i>SLIT1</i>     |
| 171 | <i>TCEAL5</i>    |
| 172 | <i>GABRG2</i>    |
| 173 | <i>GNAO1</i>     |
| 174 | <i>GRID2</i>     |
| 175 | <i>PPP2R2C</i>   |
| 176 | <i>RUFY3</i>     |
| 177 | <i>CASKIN1</i>   |
| 178 | <i>ADGRL1</i>    |
| 179 | <i>SORCS3</i>    |
| 180 | <i>SPTBN4</i>    |
| 181 | <i>CNTNAP4</i>   |
| 182 | <i>PDZD4</i>     |
| 183 | <i>PEX5L</i>     |
| 184 | <i>SOX8</i>      |
| 185 | <i>CSPG5</i>     |
| 186 | <i>ATCAY</i>     |
| 187 | <i>RPRD1A</i>    |
| 188 | <i>RGS8</i>      |
| 189 | <i>PHF21B</i>    |
| 190 | <i>ACTN2</i>     |
| 191 | <i>GAD2</i>      |
| 192 | <i>SLC6A11</i>   |
| 193 | <i>SLC32A1</i>   |
| 194 | <i>KCNJ4</i>     |
| 195 | <i>MEGF11</i>    |
| 196 | <i>POU3F3</i>    |
| 197 | <i>SV2B</i>      |
| 198 | <i>ELAVL2</i>    |
| 199 | <i>IGLON5</i>    |

|     |               |
|-----|---------------|
| 200 | <i>LRRC3B</i> |
|-----|---------------|

**Table S6. The list of repurposable, approved drugs identified by the GREP analysis, related to Figure 5.**

Drug indications and mechanisms of action were curated from the Drugbank database [S15]. GABA, gamma-aminobutyric acid; GABA(A), gamma-aminobutyric acid Type A; VDCC, Voltage-dependent calcium channel; KCNK3, Potassium Two Pore Domain Channel Subfamily K Member 3; CHRNA4, Cholinergic Receptor Nicotinic Alpha 4 Subunit; CaV2.2, Neuronal voltage-gated N-type Calcium Channel.

| <b>Drug</b>         | <b>Indication</b>                      | <b>Mechanism of action</b>                     |
|---------------------|----------------------------------------|------------------------------------------------|
| Acamprosate         | Withdrawal symptoms of alcoholism      | Analogue of GABA                               |
| Adinazolam          | Seizures                               | GABA positive allosteric modulator             |
| Alprazolam          | Anxiety and panic disorders            | GABA(A) receptor positive allosteric modulator |
| Betahistine         | Vertigo                                | H1-receptor agonist                            |
| Brivaracetam        | Seizures                               | Unknown, synaptic GABA release                 |
| Bromazepam          | Anxiety and panic disorders            | GABA(A) receptor positive allosteric modulator |
| Chlordiazepoxide    | Withdrawal symptoms of alcoholism      | GABA(A) receptor positive allosteric modulator |
| Cinolazepam         | Sleep disorders                        | GABA positive allosteric modulator             |
| Clobazam            | Seizures                               | GABA positive allosteric modulator             |
| Clonazepam          | Anxiety and panic disorders            | GABA(A) receptor positive allosteric modulator |
| Clotiazepam         | Anxiety                                | GABA(A) receptor positive allosteric modulator |
| Desflurane          | Anesthetic                             | GABA(A) receptor positive allosteric modulator |
| Diazepam            | Anxiety and alcohol withdrawal         | GABA(A) receptor positive allosteric modulator |
| Enflurane           | Anesthetic                             | GABA(A) receptor potentiator                   |
| Estazolam           | Insomnia                               | GABA(A) receptor positive allosteric modulator |
| Eszopiclone         | Insomnia                               | GABA(A) receptor potentiator                   |
| Ethchlorvynol       | Insomnia                               | GABA(A) receptor positive allosteric modulator |
| Etizolam            | Anxiety and insomnia                   | GABA(A) receptor positive allosteric modulator |
| Etomidate           | Anesthetic                             | GABA receptor subunit alpha-1 potentiator      |
| Fludiazepam         | Convulsion                             | GABA receptor subunit alpha-1 agonist          |
| Flurazepam          | Anxiety and convulsion                 | GABA(A) receptor positive allosteric modulator |
| Gabapentin          | Convulsion                             | VDCC subunit alpha-2/delta-1 inhibitor         |
| Glutethimide        | Sedative                               | GABA receptor subunit alpha-1 agonist          |
| Halazepam           | Seizures and anxiety                   | GABA(A) receptor positive allosteric modulator |
| Halothane           | Anesthetic                             | KCNK3 binder                                   |
| Isoflurane          | Anesthetic                             | GABA receptor subunit alpha-1 agonist          |
| Levetiracetam       | Seizures                               | CaV2.2 subunit alpha-1B inhibitor              |
| Lorazepam           | Seizures, anxiety, and panic disorders | GABA(A) receptor positive allosteric modulator |
| Lormetazepam        | Anxiety                                | GABA(A) receptor positive allosteric modulator |
| Meprobamate         | Anxiety                                | GABA agonist                                   |
| Metharbital         | Convulsion                             | GABA receptor subunit alpha-2 potentiator      |
| Methoxyflurane      | Anesthetic                             | GABA receptor subunit alpha-1 agonist          |
| Methylphenobarbital | Seizures                               | Depressant of the central nervous system       |
| Midazolam           | Anxiety and convulsion                 | GABA(A) receptor positive allosteric modulator |
| Nicotine            | Smoking cessation.                     | Neuronal CHRNA4 agonist                        |

|               |                                   |                                                |
|---------------|-----------------------------------|------------------------------------------------|
| Nitrazepam    | Anxiety and insomnia              | GABA positive allosteric modulator             |
| Oxazepam      | Withdrawal symptoms of alcoholism | GABA(A) receptor positive allosteric modulator |
| Pentobarbital | Seizures and sedation             | GABA(A) receptor potentiator                   |
| Pitolisant    | Narcolepsy                        | Antagonist at the histamine H3 receptor        |
| Prazepam      | Anxiety                           | GABA(A) receptor positive allosteric modulator |
| Primidone     | Seizures                          | GABA receptor subunit beta-2 potentiator       |
| Propofol      | Sedative                          | GABA receptor subunit beta-2 potentiator       |
| Quazepam      | Insomnia                          | GABA positive allosteric modulator             |
| Sevoflurane   | Anesthetic                        | GABA(A) receptor agonist                       |
| Stiripentol   | Seizures                          | GABA(A) receptor agonist allosteric modulator  |
| Talbutal      | Sedative                          | GABA receptor subunit alpha-2 potentiator      |
| Temazepam     | Anxiety and panic disorders       | GABA(A) receptor positive allosteric modulator |
| Topiramate    | Seizures                          | GABRA1 agonist                                 |
| Triazolam     | Insomnia                          | GABA(A) receptor positive allosteric modulator |
| Varenicline   | Smoking cessation                 | CHRNA4 partial agonist                         |
| Ziconotide    | Chronic pain                      | CaV2.2 subunit alpha-1B inhibitor              |

**Table S7. *KIF5A* genotypes influenced the age of symptom onset among *C9orf72* carriers, related to Figure 4.**

The table summarizes the age at onset of *C9orf72* individuals carrying the rs113247976 (chr12:57581917) variant in the *KIF5A* gene. N, number of cases.

| Variant                         | Status                 | Genotype | Age at onset mean | Age at onset standard deviation | Cases (n) |
|---------------------------------|------------------------|----------|-------------------|---------------------------------|-----------|
| rs113247976<br>( <i>KIF5A</i> ) | <i>C9orf72</i> carrier | CC       | 57.81             | 9.49                            | 780       |
|                                 |                        | CT       | 54.19             | 11.09                           | 37        |
|                                 |                        | TT       | NA                | NA                              | 0         |
|                                 | Non-carrier            | CC       | 60.08             | 12.54                           | 6,827     |
|                                 |                        | CT       | 60.06             | 12.14                           | 206       |
|                                 |                        | TT       | 61.75             | 11.76                           | 4         |

**Table S8. The sources of the cohorts used in this study, related to Star Methods.**

| <b>Dataset</b>                 | <b>Sample size</b>                 | <b>Reference</b> |
|--------------------------------|------------------------------------|------------------|
| Reference                      | 12,577 ALS cases & 23,475 controls | 16               |
| Training                       | 7,030 ALS cases & 34,235 controls  | 16,17            |
| Test ( <i>C9orf72</i> )        | 817 ALS/FTD                        | 16,18            |
| Replication ( <i>C9orf72</i> ) | 699 ALS/FTD                        | 14               |

**Table S9. The clinical descriptions of the test cohort, related to Star Methods.**

The test cohort is composed of 817 *C9orf72* carriers. FTLT, frontotemporal lobar degeneration; FTLT-Tau, frontotemporal lobar degeneration with tau pathology; PSP, progressive supranuclear palsy; FTLT TDP, frontotemporal lobar degeneration with TDP-43 inclusions; FTLT-U, frontotemporal lobar degeneration with ubiquitin-positive inclusions; NOS, not otherwise specified. \*One FTLT NOS patient was initially clinically misdiagnosed as PSP.

| Type         | Subtype                  | Size |
|--------------|--------------------------|------|
| Asymptomatic |                          | 13   |
| Clinical     | ALS                      | 666  |
| Clinical     | FTD Motor neuron disease | 81   |
| Clinical     | FTD Behavioral variant   | 23   |
| Clinical     | FTD Language variant NOS | 1    |
| Clinical     | FTD Nonfluent variant    | 3    |
| Clinical     | FTD NOS                  | 2    |
| Clinical     | FTD Semantic variant     | 3    |
| Pathological | FTLT NOS*                | 9    |
| Pathological | FTLT Tau (PSP)           | 2    |
| Pathological | FTLT TDP Type A          | 4    |
| Pathological | FTLT TDP Type B          | 1    |
| Pathological | FTLT TDP Type Unknown    | 6    |
| Pathological | FTLT U                   | 3    |

**Table S10. The cell lines used for the drug validation experiments, related to Figure 6 and Figure S7.**

F, female; M, male.

| iPSC cell line      | Source     | Clinical remarks                                             | Mutation                                | Race      | Sex | Age at collection | Supplier                |
|---------------------|------------|--------------------------------------------------------------|-----------------------------------------|-----------|-----|-------------------|-------------------------|
| CS14iCTR-nxx        | Fibroblast | Clinically normal and healthy volunteer                      | Unknown                                 | Caucasian | F   | 52                | Cedars-Sinai            |
| GM23338             | Fibroblast | Clinically normal and healthy volunteer                      | Unknown                                 | Caucasian | M   | 55                | Coriell Biorepository   |
| MIFF1               | Fibroblast | Clinically normal and healthy volunteer                      | Unknown                                 | Caucasian | M   | <1 month old      | University of Sheffield |
| CS02iCTR-NTn1       | PBMC       | Clinically normal and healthy volunteer                      | Unknown                                 | Caucasian | M   | 51                | Cedars-Sinai            |
| ALS-183-C9          | Fibroblast | ALS, age of onset = 48; disease duration = 27 months.        | <i>C9orf72</i> repeat expansion         | Caucasian | M   | 50                | University of Sheffield |
| ALS-78              | Fibroblast | ALS, age of onset = unknown; disease duration = 31.7 months  | <i>C9orf72</i> repeat expansion         | Caucasian | M   | 66                | University of Sheffield |
| CS28iALS-C9nxx      | Fibroblast | ALS, age of onset = 46; site of onset = left upper extremity | <i>C9orf72</i> repeat expansion         | Caucasian | M   | 47                | Cedars-Sinai            |
| CS29iALS-C9nxx      | Fibroblast | ALS, age of onset = unknown; disease duration = unknown      | <i>C9orf72</i> repeat expansion         | Caucasian | M   | 47                | Cedars-Sinai            |
| CS52iALS-C9nxx      | Fibroblast | ALS, age of onset = 57; disease duration = 48 months         | <i>C9orf72</i> repeat expansion         | Unknown   | M   | 49                | Cedars-Sinai            |
| CS29iALS-C9n1.ISOxx | Fibroblast | ALS, Age of onset: Unknown; disease duration, Unknown        | Isogenic control line of CS29iALS-C9nxx | Caucasian | M   | 47                | Cedars-Sinai            |
| CS52iALS-C9n6.ISOxx | Fibroblast | ALS, age of onset = 57; disease duration = 48 months         | Isogenic control line of CS52iALS-nxx   | Unknown   | M   | 49                | Cedars-Sinai            |



**Table S11. The antibodies used in motor neuron staining, related to Star Methods.**

ChAT, Choline acetyltransferase; MAP2, Microtubule-associated protein 2; Islet 1/2, ISL LIM Homeobox 1/2.

|                             | Host       | Dilution | Wavelength (nm) | Supplier         | Catalogue Number |
|-----------------------------|------------|----------|-----------------|------------------|------------------|
| <b>Primary Antibodies</b>   |            |          |                 |                  |                  |
| Beta III tubulin            | Mouse      | 1:1000   | -               | Biologend        | 801201           |
| Caspase-3                   | Rabbit     | 1:200    | -               | Merck Millipore  | AB3623           |
| ChAT                        | Goat       | 1:100    | -               | Merck Millipore  | AB144P           |
| MAP-2                       | Guinea pig | 1:1000   | -               | Synaptic systems | 188004           |
| Islet 1/2                   | Rabbit     | 1:500    | -               | Abcam            | ab109517         |
| NeuN                        | Mouse      | 1:1000   | -               | Millipore        | MAB377           |
| <b>Secondary Antibodies</b> |            |          |                 |                  |                  |
| Anti-rabbit                 | Donkey     | -        | 488             | Thermofisher     | A21206           |
| Anti-rabbit                 | Donkey     | -        | 568             | Thermofisher     | A10042           |
| Anti-mouse                  | Donkey     | -        | 568             | Thermofisher     | A10037           |
| Anti-mouse                  | Donkey     | -        | 488             | Thermofisher     | A21202           |
| Anti-goat                   | Donkey     | -        | 555             | Thermofisher     | A21432           |
| Anti-guinea pig             | Goat       | -        | 647             | Thermofisher     | A21450           |

## OTHER INFORMATION

### Consortia

#### The members of the International ALS Genomics Consortium are:

Robert H. Baloh<sup>1</sup>, Robert Bowser<sup>2</sup>, Christopher B. Brady<sup>3</sup>, Alexis Brice<sup>4,5</sup>, James Broach<sup>6</sup>, William Camu<sup>7</sup>, Ruth Chia<sup>8</sup>, Adriano Chiò<sup>9,10,11</sup>, John Cooper-Knock<sup>12</sup>, Daniele Cusi<sup>13</sup>, Jinhui Ding<sup>14</sup>, Carsten Drepper<sup>15</sup>, Vivian E. Drory<sup>16</sup>, Travis L. Dunkley<sup>17</sup>, Eva Feldman<sup>18</sup>, Mary Kay Floeter<sup>19</sup>, Pietro Fratta<sup>20</sup>, Glenn Gerhard<sup>17</sup>, J. Raphael Gibbs<sup>14</sup>, Summer B. Gibson<sup>21</sup>, Jonathan D. Glass<sup>22</sup>, Stephen A. Goutman<sup>18</sup>, John Hardy<sup>23</sup>, Matthew B. Harms<sup>24</sup>, Terry D. Heiman-Patterson<sup>25,26</sup>, Lilja Jansson<sup>27</sup>, Janine Kirby<sup>28</sup>, Hannu Laaksovirta<sup>27</sup>, John E. Landers<sup>29</sup>, Francesco Landi<sup>30</sup>, Isabelle Le Ber<sup>31</sup>, Serge Lumbroso<sup>32</sup>, Claire Guissart<sup>32</sup>, Daniel J.L. MacGowan<sup>33</sup>, Nicholas J. Maragakis<sup>34</sup>, Gabriele Mora<sup>9</sup>, Kevin Mouzat<sup>32</sup>, Liisa Myllykangas<sup>27</sup>, Richard W. Orrell<sup>35</sup>, Lyle W. Ostrow<sup>26</sup>, Stuart Pickering-Brown<sup>36</sup>, Erik P. Pioro<sup>37</sup>, Stefan M. Pulst<sup>21</sup>, John M. Ravits<sup>38</sup>, Alan E. Renton<sup>39</sup>, Wim Robberecht<sup>40</sup>, Ekaterina Rogaeva<sup>41</sup>, Jeffrey D. Rothstein<sup>42</sup>, Erika Salvi<sup>43</sup>, Sonja W. Scholz<sup>42,44</sup>, Michael Sendtner<sup>45</sup>, Pamela J. Shaw<sup>12</sup>, Katie C. Sidle<sup>23</sup>, Zachary Simmons<sup>46</sup>, David J. Stone<sup>47</sup>, Pentti J. Tienari<sup>27</sup>, Bryan J. Traynor<sup>8,23,42,48,49</sup>, John Q. Trojanowski<sup>50</sup>, Juan C. Troncoso<sup>51</sup>, Miko Valori<sup>27</sup>, Philip Van Damme<sup>41,52</sup>, Vivianna M. Van Deerlin<sup>50</sup>, Ludo Van Den Bosch<sup>41</sup>, Lorne Zinman<sup>53</sup>

1. Department of Neurology, Cedars-Sinai Medical Center, Los Angeles, CA 90048, USA
2. Division of Neurology, Barrow Neurological Institute, Phoenix, AZ 85013, USA
3. Research and Development Service, Veterans Affairs Boston Healthcare System, Boston, MA 02130, USA
4. Centre de Recherche de l'Institut du Cerveau et de la Moelle épinière, Université Pierre et Marie Curie, Paris, France
5. INSERM U975, Paris, France
6. Department of Biochemistry, Penn State College of Medicine, Hershey, PA 17033, USA
7. ALS reference center, Gui de Chauliac Hospital, CHU and Univ Montpellier, Montpellier, France
8. Neuromuscular Diseases Research Section, National Institute on Aging, Bethesda, MD 20892, USA
9. 'Rita Levi Montalcini' Department of Neuroscience, University of Turin, Via Verdi 8, Turin, 10124, Italy
10. Neuroscience Institute of Torino, University of Turin, Turin, 10124, Italy
11. Institute of Cognitive Sciences and Technologies, C.N.R., Rome, Italy
12. Sheffield Institute for Translational Neuroscience (SITraN), University of Sheffield, Sheffield, UK
13. Bio4Dreams Scientific Unit Bio4Dreams - Business Nursery for Life Sciences Milano Italy
14. Computational Biology Group, Laboratory of Neurogenetics, National Institute on Aging, Bethesda, MD 20892, USA
15. Institute of Clinical Neurobiology, University Hospital Wuerzburg, Wuerzburg 97080, Germany
16. Department of Neurology, Tel-Aviv Sourasky Medical Center, Tel-Aviv,
17. Department of Pathology, Penn State College of Medicine, Hershey, PA 17033, USA
18. Department of Neurology, University of Michigan, 1500 E Medical Center Dr, Ann Arbor, MI 48109, USA
19. Motor Neuron Disorders Unit, National Institute of Neurological Disorders and Stroke, Bethesda, MD 20892, USA
20. Sobell Department of Motor Neuroscience and Movement Disorders, Institute of Neurology, University College London, London, WC1N 3BG, UK
21. Department of Neurology, University of Utah School of Medicine, 175 North Medical Drive East, Salt Lake City, UT 84132, USA
22. Department of Neurology, Emory University School of Medicine, Atlanta, GA 30322, USA

23. Department of Molecular Neuroscience and Reta Lila Weston Laboratories, Institute of Neurology, University College London, London, WC1N 3BG, UK
24. Department of Neurology, Columbia University, New York, NY 10032, USA
25. Department of Neurology, Drexel University College of Medicine, Philadelphia, PA 19102, USA
26. Department of Neurology, Temple University, 7602 Central Ave, Philadelphia, PA 19111, USA
27. Department of Neurology and HUSLAB, Helsinki University Hospital, Translational Immunology, Research Programs Unit and Department of Pathology University of Helsinki, Helsinki, FIN-02900, Finland
28. Department of Neuroscience, University of Sheffield, Sheffield, S10 2HQ, UK
29. Department of Neurology, University of Massachusetts Medical School, Worcester, MA 01605, USA
30. Fondazione Policlinico Universitario Agostino Gemelli IRCCS, Università Cattolica del Sacro Cuore, Rome, Italy
31. Service de Biochimie, CHU de Nîmes, Nîmes, France
32. CHU Nîmes, Univ. Montpellier, INM, INSERM, Montpellier, France
33. New York Hospital Cornell University Medical Center 1305 York Avenue NYC NY 10021
34. Department of Neurology, Johns Hopkins University, Baltimore, MD 21287, USA 40.
35. Department of Clinical Neuroscience, Institute of Neurology, University College London, London, NW2 2PG, UK
36. Faculty of Human and Medical Sciences, University of Manchester, Manchester, M13 9PT, UK
37. Department of Neurology, Cleveland Clinic, Cleveland, OH 44195, USA
38. Neuroscience and Disease, University of California San Diego, 9500 Gilman Drive, La Jolla, CA 92093, USA
39. Department of Neuroscience, Ronald M. Loeb Center for Alzheimer's Disease, Icahn School of Medicine at Mount Sinai, New York, NY 10029, USA
40. Department of Neurosciences, Experimental Neurology, and Leuven Research Institute for Neuroscience and Disease, University of Leuven, Leuven, 3000, Belgium
41. Division of Neurology, Tanz Centre for Research of Neurodegenerative Diseases and Toronto Western Hospital, University of Toronto, Toronto, M5S 3H2, Canada
42. Department of Neurology, Johns Hopkins University, Baltimore, MD 21287, USA 40
43. Neurology and Headache Unit, Fondazione IRCCS Istituto Neurologico "Carlo Besta", Milan, Italy
44. Neurodegenerative Diseases Research Section, National Institute of Neurological Disorders and Stroke, Bethesda, MD 20892, USA
45. Department of Neurology, Institute for Clinical Neurobiology, University of Würzburg, Würzburg, D-97078, Germany
46. Department of Neurology, Penn State College of Medicine, Hershey, PA 17033, USA
47. Genetics, Genetics and Pharmacogenomics, Merck Research Laboratories, Merck & Co., Inc., West Point, PA 19486, USA
48. National Institute of Neurological Disorders and Stroke, Bethesda, MD 20892, USA
49. RNA Therapeutics Laboratory, National Center for Advancing Translational Sciences, NIH, Rockville, MD 20850, USA
50. Department of Pathology and Laboratory Medicine, University of Pennsylvania, Philadelphia, PA 19104, USA
51. Clinical and Neuropathology Core, Johns Hopkins University, Baltimore, MD 21287, USA
52. VIB, Center for Brain & Disease Research, Laboratory of Neurobiology, University of Leuven, Leuven, 3000, Belgium
53. Division of Neurology, Sunnybrook Health Sciences Centre, University of Toronto, Toronto, M4N 3M5, Canada

**The members of the ITALSGEN Consortium are:**

Stefania M. Angelocola<sup>1</sup>, Francesco P. Ausiello<sup>2</sup>, Marco Barberis<sup>3</sup>, Iliaria Bartolomei<sup>4</sup>, Stefania Battistini<sup>5</sup>, Enrica Bersano<sup>6,7</sup>, Giulia Bisogni<sup>8</sup>, Giuseppe Borghero<sup>9</sup>, Maura Brunetti<sup>10</sup>, Corrado Cabona<sup>11</sup>, Andrea Calvo<sup>10,12</sup>, Fabrizio Canale<sup>13</sup>, Antonio Canosa<sup>10,12,14</sup>, Teresa A. Cantisani<sup>15</sup>, Margherita Capasso<sup>16</sup>, Claudia Caponnetto<sup>11</sup>, Patrizio Cardinali<sup>1</sup>, Paola Carrera<sup>17</sup>, Federico Casale<sup>10</sup>, Adriano Chiò<sup>10,12,14</sup>, Tiziana Colletti<sup>18</sup>, Francesca L. Conforti<sup>19</sup>, Amelia Conte<sup>8</sup>, Elisa Conti<sup>20,21</sup>, Massimo Corbo<sup>22</sup>, Stefania Cuccu<sup>9</sup>, Eleonora Dalla Bella<sup>6</sup>, Eustachio D'Errico<sup>23</sup>, Giovanni DeMarco<sup>10</sup>, Raffaele Dubbioso<sup>2</sup>, Carlo Ferrarese<sup>20,21</sup>, Pilar M. Ferraro<sup>11</sup>, Massimo Filippi<sup>24,25,26,27</sup>, Nicola Fini<sup>28</sup>, Gianluca Floris<sup>9</sup>, Giuseppe Fuda<sup>10</sup>, Salvatore Gallone<sup>10</sup>, Giulia Gianferrari<sup>28</sup>, Fabio Giannini<sup>5</sup>, Maurizio Grassano<sup>10</sup>, Lucia Greco<sup>29</sup>, Barbara Iazzolino<sup>10</sup>, Alessandro Introna<sup>23</sup>, Vincenzo La Bella<sup>18</sup>, Serena Lattante<sup>30,31</sup>, Giuseppe Lauria<sup>6,32</sup>, Rocco Liguori<sup>33</sup>, Giancarlo Logroscino<sup>34,35</sup>, Francesco O. Logullo<sup>36</sup>, Christian Lunetta<sup>29</sup>, Paola Mandich<sup>11,37</sup>, Jessica Mandrioli<sup>38,39</sup>, Umberto Manera<sup>10</sup>, Fiore Manganelli<sup>2</sup>, Giuseppe Marangi<sup>30,31</sup>, Kalliopi Marinou<sup>40</sup>, Maria Giovanna Marrosu<sup>41</sup>, Iliaria Martinelli<sup>28</sup>, Sonia Messina<sup>42</sup>, Cristina Moglia<sup>10,12</sup>, Maria Rosaria Monsurro<sup>43</sup>, Gabriele Mora<sup>9</sup>, Lorena Mosca<sup>44</sup>, Maria R. Murru<sup>9</sup>, Paola Origone<sup>11</sup>, Carla Passaniti<sup>43</sup>, Cristina Petrelli<sup>36</sup>, Antonio Petrucci<sup>45</sup>, Angelo Pirisi<sup>46</sup>, Susanna Pozzi<sup>29</sup>, Maura Pugliatti<sup>46</sup>, Angelo Quattrini<sup>47</sup>, Claudia Ricci<sup>5</sup>, Giulia Riolo<sup>5</sup>, Nilo Riva<sup>47</sup>, Massimo Russo<sup>48</sup>, Mario Sabatelli<sup>49</sup>, Paolina Salamone<sup>10</sup>, Marco Salivetto<sup>29</sup>, Fabrizio Salvi<sup>4</sup>, Marialuisa Santarelli<sup>50</sup>, Luca Sbaiz<sup>3</sup>, Riccardo Sideri<sup>40</sup>, Isabella Simone<sup>23</sup>, Cecilia Simonini<sup>28</sup>, Rossella Spataro<sup>18</sup>, Raffaella Tanel<sup>51</sup>, Gioacchino Tedeschi<sup>43</sup>, Anna Ticca<sup>52</sup>, Antonella Torriello<sup>53</sup>, Stefania Tranquilli<sup>9</sup>, Lucio Tremolizzo<sup>20,21</sup>, Francesca Trojsi<sup>43</sup>, Rosario Vasta<sup>10</sup>, Veria Vacchiano<sup>4</sup>, Giuseppe Vita<sup>48</sup>, Paolo Volanti<sup>54</sup>, Marcella Zollino<sup>55,56</sup>, Elisabetta Zucchi<sup>28</sup>

1. Neurology Unit, AST Ferme, Marche, Italy
2. Department of Neurosciences, Reproductive Sciences and Odontostomatology, University of Naples Federico II, Napoli, Italy
3. Department of Medical Genetic, Azienda Ospedaliero Universitaria Città Della Salute e Della Scienza, Torino, Italy
4. Center for Diagnosis and Cure of Rare Diseases, Department of Neurology, IRCCS Institute of Neurological Sciences, Bologna, Italy
5. Department of Medical, Surgical and Neurological Sciences, University of Siena, Siena, Italy
6. 3rd Neurology Unit and Motor Neuron Diseases Centre, IRCCS Foundation "Carlo Besta" Neurological Institute, Milano, Italy
7. 'L. Sacco' Department of Biomedical and Clinical Sciences, Università degli Studi di Milano, Università degli Studi di Milano, Milano, Italy
8. NeuroMuscular Omnicentre (NEMO), Serena Onlus, Foundation- Pol. A. Gemelli, Roma, Italy
9. Neurologic Unit, Monserrato University Hospital, Cagliari University, Cagliari, Italy
10. 'Rita Levi Montalcini' Department of Neuroscience, Amyotrophic Lateral Sclerosis Center, University of Torino, Torino, Italy
11. Department of Neurosciences, Rehabilitation, Ophthalmology, Genetics and Maternal-Child Sciences, IRCCS Ospedale Policlinico San Martino, Genoa, Italy
12. Division of Neurology, Azienda Ospedaliero-Universitaria Città della Salute e della Scienza di Torino, Torino, Italy
13. Department of Advanced Medical and Surgical Sciences, University of Campania "Luigi Vanvitelli", Caserta, Italy
14. Institute of Cognitive Sciences and Technologies, C.N.R., Rome, Italy
15. Struttura complessa di Neurofisiopatologia, Azienda Ospedaliera di Perugia, Perugia, Italy
16. Unit of Neurology, Ospedale Clinicizzato SS Annunziata, Chieti, Italy
17. Unit of Genomics for the diagnosis of human pathologies, IRCCS San Raffaele Scientific Institute, Milano, Italy
18. ALS Clinical Research Center, Bi.N.D., University of Palermo, Palermo, Italy

19. Department of Pharmacy, Health and Nutritional Sciences, University of Calabria, Rende, Italy
20. Neurology Unit, "San Gerardo" hospital, Monza, Italy
21. School of Medicine and Surgery and Milan Center for Neuroscience (NeuroMI), University of Milano-Bicocca, Milano, Italy
22. Department of Neurorehabilitation Sciences, Casa Cura Policlinico, Milano, Italy
23. Department of Basic Medical Sciences, Neurosciences and Sense Organs, University of Bari "Aldo Moro", Policlinic, Bari, Italy
24. Neurology Unit and Rehabilitation Unit, IRCCS "San Raffaele Scientific Institute", Milano, Italy
25. Neuroimaging Research Unit, Division of Neuroscience, IRCCS "San Raffaele Scientific Institute", Milano, Italy
26. Neurophysiology Service, IRCCS "San Raffaele Scientific Institute," Milano, Italy
27. Vita-Salute San Raffaele University, Milano, Italy
28. Department of Neurosciences, Ospedale Civile S. Agostino Estense, Azienda Ospedaliero Universitaria di Modena, Modena, Italy
29. NEMO Clinical Center Milano, Fondazione Serena Onlus, Milano, Italy
30. Genetica Medica, Fondazione Policlinico Universitario A. Gemelli IRCCS, Roma, Italy
31. Dipartimento Universitario Scienze della Vita e Sanità Pubblica, Sezione di Medicina Genomica, Università Cattolica del Sacro Cuore Facoltà di Medicina e Chirurgia, Roma, Italy
32. Department of Biomedical and Clinical Sciences Luigi Sacco, University of Milan, Milano, Italy
33. Department of Biomedical and Neuromotor Sciences, University of Bologna, Bologna, Italy
34. Department of Basic Medical Sciences, Neuroscience and Sense Organs, University of Bari Aldo Moro, Bari, Italy
35. Center for Neurodegenerative Diseases and the Aging Brain, Department of Clinical Research in Neurology, Pia Fondazione Cardinale G Panico, Tricase, Italy
36. Neurology Unit, AV3, ASUR Marche, Macerata, Italy
37. Medical Genetics Unit, IRCCS Ospedale Policlinico San Martino, Genoa, Italy
38. Department of Neurosciences, Azienda Ospedaliero Universitaria di Modena, Modena, Italy
39. Department of Biomedical, Metabolic and Neural Sciences, University of Modena and Reggio Emilia, Modena, Italy
40. Department of Neurorehabilitation, Istituti Clinici Scientifici Maugeri IRCCS, Institute of Milan, Milano, Italy
41. Department of Neurology, Azienda Universitario Ospedaliera di Cagliari and University of Cagliari, Cagliari, Italy
42. NEuroMuscular Omnicentre (NEMO) Sud, Fondazione Aurora, OUC Neurology and Neuromuscular Disorders, University of Messina, Italy, Messina, Italy
43. Department of Advanced Medical and Surgical Sciences, University of Campania "Luigi Vanvitelli", Napoli, Italy
44. Department of Laboratory Medicine, Medical Genetics, Niguarda Ca' Granda Hospital, Milano, Italy
45. Neurology Department, San Camillo Hospital, Roma, Italy
46. Department of Biomedical and Surgical Sciences, Section of Neurological, Psychiatric and Psychological Sciences, University of Ferrara, Ferrara, Italy
47. Department of Neurology, IRCCS "San Raffaele Scientific Institute", Milano, Italy
48. OUC Neurology and Neuromuscular Disorders, University of Messina, Messina, Italy
49. NeuroMuscular Omnicentre (NEMO) - Fondazione Policlinico Universitario A. Gemelli, Università Cattolica del Sacro Cuore, Roma, Italy
50. Department of Medicine, Azienda Complesso Ospedaliero, San Filippo Neri, Roma, Italy
51. Operative Unit of Neurology, S. Chiara Hospital, Trento, Italy
52. Department of Neurology, Azienda Ospedaliera San Francesco, Nuoro, Italy
53. ALS Center, Operative Unit of Neurology, AOU "San Giovanni di Dio e Ruggi d'Aragona", Salerno, Italy
54. Neurorehabilitation Unit – ALS Center, Istituti Clinici Scientifici (ICS) Maugeri, Mistretta, Italy

55. Sezione di Medicina Genomica, Dipartimento Scienze della Vita e Sanità Pubblica, Facoltà di Medicina e Chirurgia, Università Cattolica Sacro Cuore, Roma, Italy
56. Unità di Genetica Medica, Fondazione Policlinico Universitario A. Gemelli IRCCS, Roma, Italy

**The members of the SLAGEN Consortium are:**

Vincenzo Silani<sup>1,2</sup>, Isabella Fogh<sup>3</sup>, Nicola Ticozzi<sup>1,2</sup>, Antonia Ratti<sup>2,4</sup>, Cinzia Tiloca<sup>2</sup>, Silvia Peverelli<sup>2</sup>, Cinzia Gellera<sup>5</sup>, Giuseppe Lauria Pinter<sup>6,7</sup>, Franco Taroni<sup>5</sup>, Viviana Pensato<sup>5</sup>, Barbara Castellotti<sup>5</sup>, Giacomo P. Comi<sup>1,8</sup>, Stefania Corti<sup>1,8</sup>, Roberto Del Bo<sup>1,8</sup>, Cristina Cereda<sup>9</sup>, Mauro Ceroni<sup>9,10</sup>, Stella Gagliardi<sup>9</sup>, Lucia Corrado<sup>11</sup>, Letizia Mazzini<sup>12</sup>, Gianni Sorarù<sup>13</sup>, Flavia Raggi<sup>13</sup>, Gabriele Siciliano<sup>14</sup>, Costanza Simoncini<sup>14</sup>, Annalisa Lo Gerfo<sup>14</sup>, Massimiliano Filosto<sup>15</sup>, Maurizio Inghilleri<sup>16,17</sup>, Alessandra Ferlini<sup>18</sup>

1. Department of Pathophysiology and Transplantation, “Dino Ferrari” Center, Università degli Studi di Milano, Milan, Italy
2. Department of Neurology and Laboratory of Neuroscience, Istituto Auxologico Italiano IRCCS, Milan, Italy
3. United Kingdom Dementia Research Institute, Maurice Wohl Clinical Neuroscience Institute, Department of Basic and Clinical Neuroscience, Institute of Psychiatry, Psychology, and Neuroscience, King's College London
4. Department of Medical Biotechnology and Translational Medicine, Università degli Studi di Milano, Milan, Italy
5. Unit of Medical Genetics and Neurogenetics, Fondazione IRCCS Istituto Neurologico Carlo Besta, Milan, Italy
6. 3rd Neurology Unit, Motor Neuron Diseases Center, Fondazione IRCCS Istituto Neurologico "Carlo Besta", Milan, Italy
7. Department of Medical Biotechnology and Translational Medicine, University of Milan, Milan, Italy
8. Neurology Unit, IRCCS Foundation Ca' Granda Ospedale Maggiore Policlinico, Milan, Italy
9. Genomic and Post-Genomic Center, IRCCS Mondino Foundation, Pavia, Italy
10. Department of Brain and Behavioural Sciences, University of Pavia, Pavia, Italy
11. Department of Health Sciences, University of Eastern Piedmont, Novara, Italy
12. ALS Center Department of Neurology “Maggiore della carità” University Hospital Novara, Italy
13. Department of Neurosciences, University of Padova, Padova, Italy
14. Department of Clinical and Experimental Medicine, University of Pisa, Pisa, Italy
15. Department of Clinical and Experimental Sciences and NeMO-Brescia Clinical Center for Neuromuscular Diseases, University of Brescia, Italy
16. Department of Human Neurosciences, Rare Neuromuscular Diseases Centre, Sapienza University, Viale Dell'Università 30, 00185, Rome, Italy
17. IRCCS Neuromed, Pozzilli, Italy
18. Unit of Medical Genetics, Department of Medical Science, University of Ferrara, Ferrara, Italy

**The members of Project MinE ALS Sequencing Consortium are:**

Philip Van Damme<sup>1,2</sup>, Philippe Corcia<sup>3,4</sup>, Philippe Couratier<sup>5,4</sup>, Patrick Vourc'h<sup>6,7</sup>, Orla Hardiman<sup>8,9</sup>, Russell McLaughlin<sup>10</sup>, Marc Gotkine<sup>11</sup>, Vivian Drory<sup>12</sup>, Nicola Ticozzi<sup>13,14</sup>, Vincenzo Silani<sup>15,14</sup>, Jan H. van den Veldink<sup>16</sup>, Leonard H. Berg<sup>16</sup>, Mamede de Carvalho<sup>17,18</sup>, Jesus S. Mora Pardina<sup>19</sup>, Monica Povedano<sup>20</sup>, Peter Andersen<sup>21</sup>, Markus Weber<sup>22</sup>, Ayşe Nazlı Başak<sup>23</sup>, Ammar Al-Chalabi<sup>24,25</sup>, Chris Shaw<sup>26</sup>, Pamela J. Shaw<sup>27</sup>, Karen E. Morrison<sup>28</sup>, John E. Landers<sup>29</sup>, Jonathan D. Glass<sup>30</sup>

1. KU Leuven - University of Leuven, Department of Neurosciences, Leuven, Belgium
2. VIB, Center for Brain & Disease Research, Laboratory of Neurobiology, Leuven, Belgium

3. Centre SLA, CHRU de Tours, Tours, France; UMR 1253, iBrain, Université de Tours, Inserm, Tours, France.
4. Federation des Centres SLA Tours and Limoges, LITORALS, Tours, France
5. Centre SLA, CHU Limoges, Limoges, France
6. Service de Biochimie et Biologie moléculaire, CHU de Tours, Tours, France
7. UMR 1253, Université de Tours, Inserm, 37044 Tours, France
8. Academic Unit of Neurology, Trinity College Dublin, Trinity Biomedical Sciences Institute, Dublin, Republic of Ireland
9. Department of Neurology, Beaumont Hospital, Dublin, Republic of Ireland
10. Complex Trait Genomics Laboratory, Smurfit Institute of Genetics, Trinity College Dublin, Dublin, Republic of Ireland
11. Department of Neurology, Hadassah Medical Organization and Faculty of Medicine, Hebrew University of Jerusalem, Israel
12. Department of Neurology Tel-Aviv Sourasky Medical Centre, Israel
13. Department of Neurology and Laboratory of Neuroscience, IRCCS Istituto Auxologico Italiano, Milano, Italy
14. Department of Pathophysiology and Transplantation, 'Dino Ferrari' Center, Università degli Studi di Milano, Milano, Italy
15. Department of Neurology and Laboratory of Neuroscience, Istituto Auxologico Italiano IRCCS, Milano, Italy
16. Department of Neurology, UMC Utrecht Brain Center, University Medical Center Utrecht, Utrecht University, Utrecht, The Netherlands
17. Instituto de Fisiologia, Instituto de Medicina Molecular, Faculdade de Medicina, Universidade de Lisboa, Lisbon, Portugal
18. Department of Neurosciences, Hospital de Santa Maria-CHLN, Lisbon, Portugal
19. ALS Unit, Hospital San Rafael, Madrid, Spain
20. la Unitat Funcional de Motoneurona, Cap de Secció de Neurofisiologia, Servei de Neurologia, Hospital Universitario de Bellvitge-IDIBELL
21. Department of Clinical Science, Neurosciences, Umeå University, Sweden
22. Neuromuscular Diseases Unit/ALS Clinic, Kantonsspital St. Gallen, 9007, St. Gallen, Switzerland
23. Neurodegeneration Research Laboratory (NDAL), Research Center for Translational Medicine (KUTTAM), Koç University School of Medicine, Istanbul, Turkey
24. Maurice Wohl Clinical Neuroscience Institute, Department of Basic and Clinical Neuroscience, Institute of Psychiatry, Psychology, and Neuroscience, King's College London
25. Department of Clinical Neuroscience, King's College Hospital, London SE5 9RS, UK
26. United Kingdom Dementia Research Institute, Maurice Wohl Clinical Neuroscience Institute, Department of Basic and Clinical Neuroscience, Institute of Psychiatry, Psychology, and Neuroscience, King's College London
27. Sheffield Institute for Translational Neuroscience (SITraN), University of Sheffield, Sheffield, UK
28. School of Medicine, Dentistry and Biomedical Sciences, Queen's University Belfast, UK
29. Department of Neurology, University of Massachusetts Medical School, Worcester, MA, USA
30. Department of Neurology, Emory University School of Medicine, Atlanta, GA, USA

**The members of the American Genome Center are:**

Adelani Adeleye<sup>1,2</sup>, Camille Alba<sup>1,2</sup>, Dagmar Bacikova<sup>1,2</sup>, Clifton L. Dalgard<sup>1,3</sup>, Daniel N. Hupalo<sup>1,2</sup>, Elisa McGrath Martinez<sup>1,2</sup>, Anthony R. Soltis<sup>1,2</sup>, Gauthaman Sukumar<sup>1,2</sup>, Coralie Viollet<sup>1,2</sup>, Matthew D. Wilkerson<sup>1,2,3</sup>

1. The American Genome Center, Collaborative Health Initiative Research Program, Uniformed Services University of the Health Sciences, Bethesda, MD 20814, USA

2. Henry M. Jackson Foundation for the Advancement of Military Medicine, Bethesda, MD, 20817, USA
3. Department of Anatomy, Physiology & Genetics, Uniformed Services University of the Health Sciences, Bethesda, MD 20814, USA

## Acknowledgments

The authors also acknowledge the ALS Association and the Muscular Dystrophy Association, which support DNA collection. This work was supported in part by the Italian Ministry of Health (Ministero della Salute, Ricerca Sanitaria Finalizzata, grant RF-2016-02362405, RF-2013-02355764, and GR-2016-02364373); the European Commission's Health Seventh Framework Programme (FP7/2007-2013 under grant agreement 259867); the Italian Ministry of Education, University and Research (Progetti di Ricerca di Rilevante Interesse Nazionale, PRIN, grant 2017SNW5 MB); the Fondazione Italiana di Ricerca per la SLA (AriSLA, Grant AZYGOS 2.0); the Joint Programme - Neurodegenerative Disease Research (Brain-Mend project) granted by Italian Ministry of Education, University and Research, and the Canadian Consortium on Neurodegeneration in Aging (CCNA). This study was performed under the Department of Excellence grant of the Italian Ministry of Education, University and Research to the 'Rita Levi Montalcini' Department of Neuroscience, University of Torino, Italy.

AAK is funded by the ALS Association Milton Safenowitz Research Fellowship (grant number 22-PDF-609.DOI:10.52546/pc.gr.150909.), The Motor Neurone Disease Association (MNDA) Fellowship (Al Khleifat/Oct21/975-799), The Darby Rimmer Foundation, and The NIHR Maudsley Biomedical Research Centre.

This study used DNA samples and clinical data from the Target ALS Human Postmortem Tissue Core, the NINDS Repository at Coriell, the North East ALS (NEALS) Consortium Biorepository, the New York Brain Bank-The Taub Institute, Columbia University, Department of Veterans Affairs Biorepository Brain Bank (grant #BX002466; CBB), the Baltimore Longitudinal Study of Aging (BLSA), and the Johns Hopkins University Alzheimer's Disease Research Center, the NICHD Brain, and Tissue Bank for Developmental Disorders at the University of Maryland.

The InCHIANTI study baseline (1998–2000) was supported as a "targeted project" (ICS110.1/RF97.71) by the Italian Ministry of Health and, in part, by the United States National Institute on Aging (contracts 263 MD 9164 and 263 MD 821336). The InCHIANTI follow-up 1 (2001–2003) was funded by the United States National Institute on Aging (contracts N.1-AG-1-1 and N.1-AG-1- 2111), and the InCHIANTI follow-ups 2 and 3 studies (2004–2010) were financed by the United States National Institute on Aging (contract N01-AG- 5-0002).

The data collection and genotyping of the *C9orf72* replication cohort at the King's College London was supported by MOTOR NEURONE DISEASE Association (MNDA) UK (grant code: Shaw/Apr18/864-791).

Project MinE data collection and genotyping of the *C9orf72* replication cohort was supported by funding provided by the Dutch Research Council (NWO) [VENI scheme grant 09150161810018] and Prinses Beatrix Spierfonds (neuromuscular fellowship grant W.F19-03 and by the Project number W.OR20-08 (The "Repeatome" as a basis for new treatments of ALS) of the Prinses Beatrix Spierfonds. and by the Dutch Research Council (NWO) [VIDI grant 91719350]. Project MinE is part of an EU Joint Programme - Neurodegenerative Disease Research (JPND) project. The project is supported through the following funding organizations under the aegis of JPND - www.jpnd.eu (the United Kingdom, Medical Research Council (MR/L501529/1; MR/R024804/1) and Economic and Social Research Council (ES/L008238/1)) and through the Motor Neurone Disease Association. This study represents independent research part-funded by the National Institute for Health Research (NIHR) Biomedical Research Centre at South



London and Maudsley NHS Foundation Trust and King's College London. This is, in part, an EU Joint Programme - Neurodegenerative Disease Research (JPND) project. The project is supported through the following funding organizations under the aegis of JPND - www.jpnd.eu (the United Kingdom, Medical Research Council (MR/L501529/1; MR/R024804/1) and Economic and Social Research Council (ES/L008238/1)) and through the Motor Neurone Disease Association. This study represents independent research part-funded by the National Institute for Health Research (NIHR) Biomedical Research Centre at South London and Maudsley NHS Foundation Trust and King's College London. In part, samples used in this research were obtained from the UK National DNA Bank for MND Research, funded by the MND Association and the Wellcome Trust. This project is partially supported by the AGING Project of the Department of Excellence at the Department of Translational Medicine (DIMET), Università del Piemonte Orientale, Novara, Italy. ALS Association Milton Safenowitz Research Fellowship funds AAK ( grant number 22-PDF-609. DOI: 10.52546/pc.gr.150909.), The Motor Neurone Disease Association (MNDA) Fellowship (Al Khleifat/Oct21/975-799) and The NIHR Maudsley Biomedical Research Centre.

The dataset(s) used for the analyses described in this manuscript were obtained from the Age-Related Eye Disease Study (AREDS) Database found at <https://www.nei.nih.gov/research/clinical-trials/age-related-eye-disease-study-aredsthrough> dbGaP accession number phs000001.v3.p1. Funding support for AREDS was provided by the National Eye Institute (N01-EY-0-2127). We thank the AREDS participants and the AREDS Research Group for their valuable contribution to this research.

The Framingham Heart Study is conducted and supported by the National Heart, Lung, and Blood Institute (NHLBI) in collaboration with Boston University (Contract No. N01-HC-25195 and HHSN268201500001I). This manuscript was not prepared in collaboration with the Framingham Heart Study investigators. It did not necessarily reflect the opinions or views of the Framingham Heart Study, Boston University, or NHLBI. Funding to support the Omni cohort recruitment, retention, and examination was provided by NHLBI Contract N01-HC-25195 and HHSN268201500001I, and NHLBI grants R01-HL070100, R01-HL076784, R01-HL-49869, and U01-HL-053941.

Research support to collect data and develop an application to support this project was provided by 3P50CA093459, 5P50CA097007, 5R01ES011740, and 5R01CA133996.

The WHI program is funded by the National Heart, Lung, and Blood Institute, National Institutes of Health, and US Department of Health and Human Services through contracts HHSN268201600018C, HHSN268201600001C, HHSN268201600002C, HHSN268201600003C, and HHSN268201600004C. This manuscript was not prepared in collaboration with investigators of the WHI, has not been reviewed and approved by the Women's Health Initiative (WHI), and does not necessarily reflect the opinions of the WHI investigators or the NHLBI. Funding support for WHI GARNET was provided through the NHGRI Genomics and Randomized Trials Network (GARNET) (Grant Number U01 HG005152). The GARNET Coordinating Center assisted with phenotype harmonization, genotype cleaning, and general study coordination (U01 HG005157). The National Center assisted with data cleaning for Biotechnology Information. Funding support for genotyping, performed at the Broad Institute of MIT and Harvard, was provided by the NIH Genes, Environment and Health Initiative [GEI] (U01 HG004424). The datasets used for the analyses described in this manuscript were obtained from dbGaP at <http://www.ncbi.nlm.nih.gov/sites/entrez?db=gap> through dbGaP accession phs000001, phs000007, phs000187, phs000196, phs000200, phs000315, phs000675, phs000248, phs000292, phs000304, phs000368, phs000372, phs000394, phs000397, phs000404, phs000421, phs000428, phs000454, phs000615, phs000801, and phs000869.

The authors acknowledge the contribution of data from Hepatitis C Pathogenesis and the Human Genome supported by 1X01HG005271-01 and R01DA013324 and accessed through dbGAP to the analysis presented in this publication.

Funding support for the Genes and Blood Clotting Study was provided through the NIH/NHLBI (R37 HL039693). The Genes and Blood Clotting Study is one of the Phase 3 studies in the Gene Environment

Association Studies (GENEVA) under GEI. The GENEVA Coordinating Center assisted with genotype cleaning (U01 HG004446). Funding support for DNA extraction and genotyping, performed at the Broad Institute, was provided by NIH/NHLBI (R37 HL039693). The Howard Hughes Medical Institute provided additional support.

The dataset(s) used for the analyses described in this manuscript were obtained from the Genotype and Phenotype (dbGaP) database found at <http://www.ncbi.nlm.nih.gov/gap> through dbGaP accession number phs000368. Samples and associated phenotype data for the Genome-Wide Association Scan [GWAS] of Polycystic Ovary Syndrome Phenotypes were provided by Andrea Dunaif, MD.

The authors acknowledge the contribution of data from Genetic Architecture of Smoking and Smoking Cessation accessed through dbGaP. Funding support for genotyping, performed at the Center for Inherited Disease Research (CIDR), was provided by 1 X01 HG005274-01. CIDR is fully funded through a federal contract from the National Institutes of Health to The Johns Hopkins University, contract number HHSN268200782096C. The Gene Environment Association Studies (GENEVA) Coordinating Center (U01 HG004446) assisted with genotype cleaning and general study coordination. Funding support for collecting datasets and samples was provided by the Collaborative Genetic Study of Nicotine Dependence (COGEN; P01 CA089392) and the University of Wisconsin Transdisciplinary Tobacco Use Research Center (P50 DA019706, P50 CA084724).

The dataset(s) used for the analyses described in this manuscript were obtained from the Genetics of Fuchs' Endothelial Corneal Dystrophy (FECD) Study through dbGaP accession number phs000421. The grants that have funded the enrollment of the cases and controls to be used in this GWAS are R01EY016514 (DUEC, PI: Gordon Klintworth), R01EY016482 (CWRU, PI: Sudha Iyengar), and 1X01HG006619-01 (PI: Sudha Iyengar, Natalie Afshari). We would like to thank the FECD participants and the FECD Research Group for their valuable contribution to this research.

The authors acknowledge the contribution of data from the CIDR-NIDA Study of HIV Host Genetics accessed through dbGaP. Funding support for genotyping, performed at the Center for Inherited Disease Research (CIDR), was provided by 1 X01 HG005275-01A1. CIDR is fully funded through a federal contract from the National Institutes of Health to The Johns Hopkins University, contract number HHSN268200782096C. Funding support for the collection of datasets and samples was provided by NIDA grants R01DA026141 (Johnson), R01DA004212 (Watters), U01DA006908 (Watters), R01DA009532 (Bluthenthal), the San Francisco Department of Public Health, SAMHSA, and HRSA.

The Genome-Wide Association Study (GWAS) of Non-Hodgkin Lymphoma (NHL) project was supported by the intramural program of the Division of Cancer Epidemiology and Genetics (DCEG), National Cancer Institute (NCI), National Institutes of Health (NIH). The datasets have been accessed through the NIH database for Genotypes and Phenotypes (dbGaP) under accession # phs000801. A complete list of acknowledgments can be found in the supplementary note (Berndt SI et al., *Nature Genet.*, 201354).

This study made use of data generated by investigators in the BEACON consortium through a grant funded by the US National Institutes of Health (NIH) (RO1CA136725) to Thomas L. Vaughan and David C. Whiteman (multiple PIs). In support of this work, TLV was supported by NIH grant KO5CA124911 and DCW by a Future Fellowship grant FT0990987 from the Australia Research Council. Additional collaborators, sources of support, and origin of the data and biospecimens are listed in the following publication: Levine DM, Ek WE, Zhang R, Liu X, Onstad L, Sather C, et al. A genome-wide association study identifies new susceptibility loci for esophageal adenocarcinoma and Barrett's esophagus. *Nat Genet.* 2013 Dec;45(12):1487–93.

The American Genome Center is partly supported by an NHLBI grant: IAA-A-HL-007.001. The opinions and assertions expressed herein are those of the author(s). They do not necessarily reflect the official

policy or position of the Uniformed Services University, the Department of Defense, the Henry M. Jackson Foundation for the Advancement of Military Medicine, Inc., or the U.S. Government.

This project is partially supported by the AGING Project for the Department of Excellence at the Department of Translational Medicine (DIMET), Università del Piemonte Orientale, Novara, Italy.

RJBD is supported by the following: (1) NIHR Biomedical Research Centre at South London and Maudsley NHS Foundation Trust and King's College London, London, UK; (2) Health Data Research UK, which is funded by the UK Medical Research Council, Engineering and Physical Sciences Research Council, Economic and Social Research Council, Department of Health and Social Care (England), Chief Scientist Office of the Scottish Government Health and Social Care Directorates, Health and Social Care Research and Development Division (Welsh Government), Public Health Agency (Northern Ireland), British Heart Foundation and Wellcome Trust; (3) The BigData@Heart Consortium, funded by the Innovative Medicines Initiative-2 Joint Undertaking under grant agreement No. 116074. This Joint Undertaking receives support from the European Union's Horizon 2020 research and innovation program and EFPIA; it is chaired by DE Grobbee and SD Anker, partnering with 20 academic and industry partners and ESC; (4) the National Institute for Health Research University College London Hospitals Biomedical Research Centre; (5) the National Institute for Health Research (NIHR) Biomedical Research Centre at South London and Maudsley NHS Foundation Trust and King's College London; (6) the UK Research and Innovation London Medical Imaging & Artificial Intelligence Centre for Value-Based Healthcare; (7) the National Institute for Health Research (NIHR) Applied Research Collaboration South London (NIHR ARC South London) at King's College Hospital NHS Foundation Trust.

## REFERENCES

- S1. Brooks, B.R., Miller, R.G., Swash, M., Munsat, T.L., and World Federation of Neurology Research Group on Motor Neuron, D. (2000). El Escorial revisited: revised criteria for the diagnosis of amyotrophic lateral sclerosis. *Amyotroph. Lateral Scler. Other Motor Neuron Disord.* 1, 293-299. <https://doi.org/10.1080/146608200300079536>.
- S2. Abrahams, S., Newton, J., Niven, E., Foley, J., and Bak, T.H. (2014). Screening for cognition and behaviour changes in ALS. *Amyotroph. Lateral Scler. Frontotemporal Degener.* 15, 9-14. <https://doi.org/10.3109/21678421.2013.805784>.
- S3. Renton, A.E., Majounie, E., Waite, A., Simon-Sanchez, J., Rollinson, S., Gibbs, J.R., Schymick, J.C., Laaksovirta, H., van Swieten, J.C., Myllykangas, L., et al. (2011). A hexanucleotide repeat expansion in *C9ORF72* is the cause of chromosome 9p21-linked ALS-FTD. *Neuron* 72, 257-268. [10.1016/j.neuron.2011.09.010](https://doi.org/10.1016/j.neuron.2011.09.010).
- S4. DeJesus-Hernandez, M., Mackenzie, I.R., Boeve, B.F., Boxer, A.L., Baker, M., Rutherford, N.J., Nicholson, A.M., Finch, N.A., Flynn, H., Adamson, J., et al. (2011). Expanded GGGGCC hexanucleotide repeat in noncoding region of *C9ORF72* causes chromosome 9p-linked FTD and ALS. *Neuron* 72, 245-256. [10.1016/j.neuron.2011.09.011](https://doi.org/10.1016/j.neuron.2011.09.011).
- S5. Tunca, C., Seker, T., Akcimen, F., Coskun, C., Bayraktar, E., Palvadeau, R., Zor, S., Kocoglu, C., Kartal, E., Sen, N.E., et al. (2020). Revisiting the complex architecture of ALS in Turkey: Expanding genotypes, shared phenotypes, molecular networks, and a public variant database. *Hum. Mutat.* 41, e7-e45. <https://doi.org/10.1002/humu.24055>.
- S6. Dolzhenko, E., van Vugt, J., Shaw, R.J., Bekritsky, M.A., van Blitterswijk, M., Narzisi, G., Ajay, S.S., Rajan, V., Lajoie, B.R., Johnson, N.H., et al. (2017). Detection of long repeat expansions from PCR-free whole-genome sequence data. *Genome Res.* 27, 1895-1903. <https://doi.org/10.1101/gr.225672.117>.
- S7. Brooks, B.R. (1994). El Escorial World Federation of Neurology criteria for the diagnosis of amyotrophic lateral sclerosis. Subcommittee on Motor Neuron Diseases/Amyotrophic Lateral Sclerosis of the World Federation of Neurology Research Group on Neuromuscular Diseases and the El Escorial "Clinical limits of amyotrophic lateral sclerosis" workshop contributors. *J. Neurol. Sci.* 124 Suppl, 96-107. [https://doi.org/10.1016/0022-510x\(94\)90191-0](https://doi.org/10.1016/0022-510x(94)90191-0).
- S8. van Rheenen, W., van der Spek, R.A.A., Bakker, M.K., van Vugt, J., Hop, P.J., Zwamborn, R.A.J., de Klein, N., Westra, H.J., Bakker, O.B., Deelen, P., et al. (2021). Common and rare variant association analyses in amyotrophic lateral sclerosis identify 15 risk loci with distinct genetic architectures and neuron-specific biology. *Nat. Genet.* 53, 1636-1648. <https://doi.org/10.1038/s41588-021-00973-1>.
- S9. Chang, C.C., Chow, C.C., Tellier, L.C., Vattikuti, S., Purcell, S.M., and Lee, J.J. (2015). Second-generation PLINK: rising to the challenge of larger and richer datasets. *Gigascience* 4, 7. [10.1186/s13742-015-0047-8](https://doi.org/10.1186/s13742-015-0047-8).
- S10. Bolger, A.M., Lohse, M., and Usadel, B. (2014). Trimmomatic: a flexible trimmer for Illumina sequence data. *Bioinformatics* 30, 2114-2120. <https://doi.org/10.1093/bioinformatics/btu170>.
- S11. Dobin, A., Davis, C.A., Schlesinger, F., Drenkow, J., Zaleski, C., Jha, S., Batut, P., Chaisson, M., and Gingeras, T.R. (2013). STAR: ultrafast universal RNA-seq aligner. *Bioinformatics* 29, 15-21. <https://doi.org/10.1093/bioinformatics/bts635>.
- S12. Love, M.I., Huber, W., and Anders, S. (2014). Moderated estimation of fold change and dispersion for RNA-seq data with DESeq2. *Genome Biol.* 15, 550. <https://doi.org/10.1186/s13059-014-0550-8>.

- S13. Du, Z.W., Chen, H., Liu, H., Lu, J., Qian, K., Huang, C.L., Zhong, X., Fan, F., and Zhang, S.C. (2015). Generation and expansion of highly pure motor neuron progenitors from human pluripotent stem cells. *Nat. Commun.* 6, 6626. <https://doi.org/10.1038/ncomms7626>.
- S14. van Rheenen, W., Shatunov, A., Dekker, A.M., McLaughlin, R.L., Diekstra, F.P., Pulit, S.L., van der Spek, R.A., Vosa, U., de Jong, S., Robinson, M.R., et al. (2016). Genome-wide association analyses identify new risk variants and the genetic architecture of amyotrophic lateral sclerosis. *Nat. Genet.* 48, 1043-1048. <https://doi.org/10.1038/ng.3622>.
- S15. Wishart, D.S., Knox, C., Guo, A.C., Shrivastava, S., Hassanali, M., Stothard, P., Chang, Z., and Woolsey, J. (2006). DrugBank: a comprehensive resource for in silico drug discovery and exploration. *Nucleic Acids Res.* 34, D668-672. <https://doi.org/10.1093/nar/gkj067>.
